# Supplementary material
Source: PubMed Central journal article supplement (PMC7744354)
Supplement: NIHMS1638168-supplement-2.pdf [file NIHMS1638168-supplement-2.pdf]

## Supplementary Information for

# An Enolase Inhibitor for the Targeted Treatment of *ENO1*-Deleted Cancers

Yu-Hsi Lin<sup>1</sup>, Nikunj Satani<sup>1,2</sup>, Naima Hammoudi<sup>1</sup>, Victoria C. Yan<sup>1</sup>, Yasaman Barekatin<sup>1</sup>, Sunada Khadka<sup>1</sup>, Jeffrey J. Ackroyd<sup>1</sup>, Dimitra K. Georgiou<sup>1</sup>, Cong-Dat Pham<sup>1</sup>, Kenisha Arthur<sup>1</sup>, David Maxwell<sup>3</sup>, Zhenghong Peng<sup>4</sup>, Paul G. Leonard<sup>5,6</sup>, Barbara Czako<sup>6</sup>, Federica Pisaneschi<sup>1</sup>, Pijus Mandal<sup>6</sup>, Yuting Sun<sup>6</sup>, Rafal Zielinski<sup>7</sup>, Susana Castro Pando<sup>1</sup>, Xiaobo Wang<sup>1</sup>, Theresa Tran<sup>1</sup>, Quanyu Xu<sup>8</sup>, Qi Wu<sup>8</sup>, Yongying Jiang<sup>8</sup>, Zhijun Kang<sup>6</sup>, John M. Asara<sup>9</sup>, Waldemar Priebe<sup>7</sup>, William Bornmann<sup>10</sup>, Joseph R. Marszalek<sup>11</sup>, Ronald A. DePinho<sup>12</sup>, and Florian L. Muller<sup>1\*</sup>

**Supplementary Figure S1.** X-ray diffraction data collection parameters and refinement statistics

**Supplementary Figure S2.** BenzylPOMHEX does not display selective toxicity against *ENO1*-deleted glioma cells

**Supplementary Figure S3.** *ENO1*-deletion status modulates sensitivity to POMHEX

**Supplementary Figure S4.** Short pulse or continuous treatment with POMHEX results in similar levels of potency against *ENO1*-deleted glioma cells

**Supplementary Figure S5.** ECAR inhibition is not due to decreased cell viability

**Supplementary Figure S6.** Exogenous pyruvate modestly attenuates sensitivity to POMHEX

**Supplementary Figure S7.** Nominal hematology parameters after single dose Enolase inhibitor treatment in NHP at doses higher than required for therapeutic efficacy

**Supplementary Figure S8.** No obvious systemic toxicities or anemia with repeated HEX treatment in NHP

**Supplementary Note 1 .** Synthesis of (1-hydroxy-2-oxopiperidin-3-yl) phosphonic acid, HEX (1), CAS: 2004714-32-1

**Supplementary Note 2.** POMHEX NCI-60

## Supplementary Figure S1

| <b>Data Collection</b>                              | <b>Enolase 2:Hex<br/>(PDB 5IDZ)</b>           |
|-----------------------------------------------------|-----------------------------------------------|
| <b>Wavelength (Å)</b>                               | 1.116                                         |
| <b>Space group</b>                                  | P2 <sub>1</sub> 2 <sub>1</sub> 2 <sub>1</sub> |
| <b>Cell dimensions</b>                              |                                               |
| <b>a, b, c (Å)</b>                                  | 68.1, 108.7, 116.5                            |
| <b>α, β, γ (°)</b>                                  | 90, 90, 90                                    |
| <b>N°. of unique reflections</b>                    | 26400                                         |
| <b>Resolution (Å)</b>                               | 79.5-2.63 (2.75-2.63)                         |
| <b>Rmerge (all I<sup>+</sup> and I<sup>-</sup>)</b> | 0.089 (0.314)                                 |
| <b>I/σ</b>                                          | 15.6 (5.1)                                    |
| <b>Completeness (%)</b>                             | 99.9 (99.3)                                   |
| <b>Redundancy</b>                                   | 6.9 (6.6)                                     |
| <hr/>                                               |                                               |
| <b>Refinement</b>                                   |                                               |
| <b>Resolution (Å)</b>                               | 54.4 – 2.63                                   |
| <b>σF</b>                                           | 1.34                                          |
| <b>N°. of reflections</b>                           | 26345                                         |
| <b>R<sub>work</sub>/R<sub>free</sub></b>            | 0.162/0.218                                   |
| <b>Wilson B</b>                                     | 35.4                                          |
| <b>N°. of atoms</b>                                 |                                               |
| <b>Protein</b>                                      | 6694                                          |
| <b>Ligands</b>                                      | 44                                            |
| <b>Ions</b>                                         | 2                                             |
| <b>Water</b>                                        | 154                                           |
| <b>Average B-factors (Å<sup>2</sup>)</b>            |                                               |
| <b>Protein</b>                                      | 35.8                                          |
| <b>Ligands</b>                                      | 39.0                                          |
| <b>Ions</b>                                         | 28.0                                          |
| <b>Water</b>                                        | 31.1                                          |
| <b>r.m.s.d.</b>                                     |                                               |
| <b>Bond lengths (Å)</b>                             | 0.004                                         |
| <b>Bond angles (°)</b>                              | 0.692                                         |

**Supplementary Figure S1. X-ray diffraction data collection parameters and refinement statistics.**

# Supplementary Figure S2

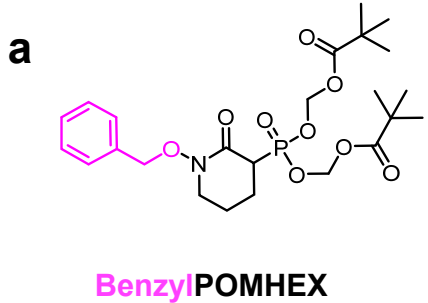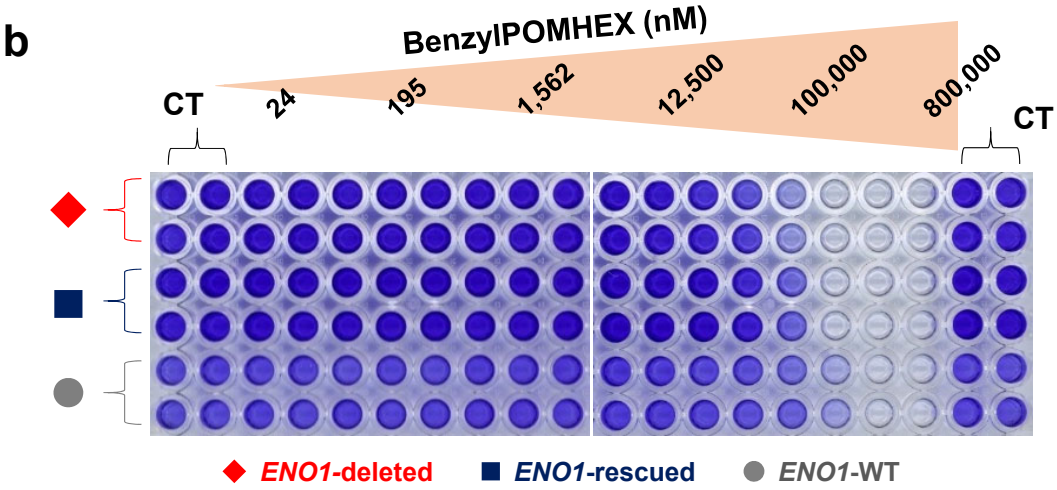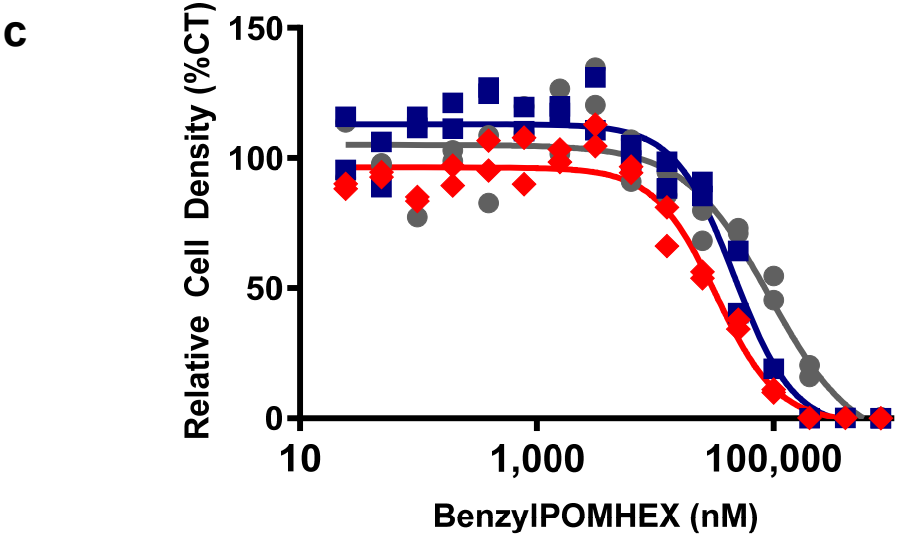

**Supplementary Figure S2. BenzylPOMHEX does not display selective toxicity against *ENO1*-deleted glioma cells.** **a.** Structure of the synthetic precursor to POMHEX, BenzylPOMHEX (Intermediate **3** in Supplementary Note); the benzyl moiety is indicated in pink. **b, c.** *ENO1*-deleted (D423, red), *ENO1*-isogenically rescued (D423 *ENO1*, blue), and *ENO1*-WT (LN319, grey) cells were treated for 7 days with BenzylPOMHEX in duplicate. Cell density was determined by crystal violet was expressed relative to a no-drug control. Toxicity against *ENO1*-deleted D423 cells is only evident at concentrations ~50,000 nM, or ~1,000-times higher than POMHEX with negligible selectivity against *ENO1*-deleted cells. This suggests that, in agreement with previous literature, the benzyl ether group is not labile in biological systems and the toxicity observed is due to effects unrelated to Enolase inhibition. This experiment was repeated once with similar results.

Supplementary Figure S3

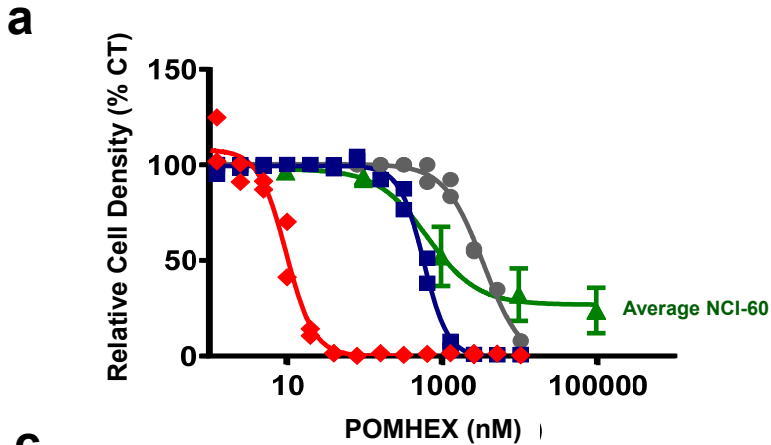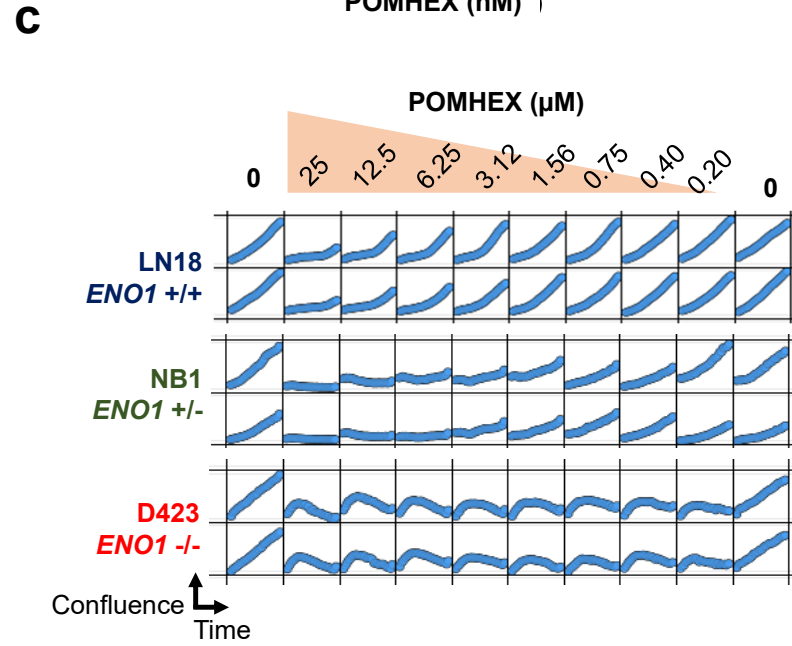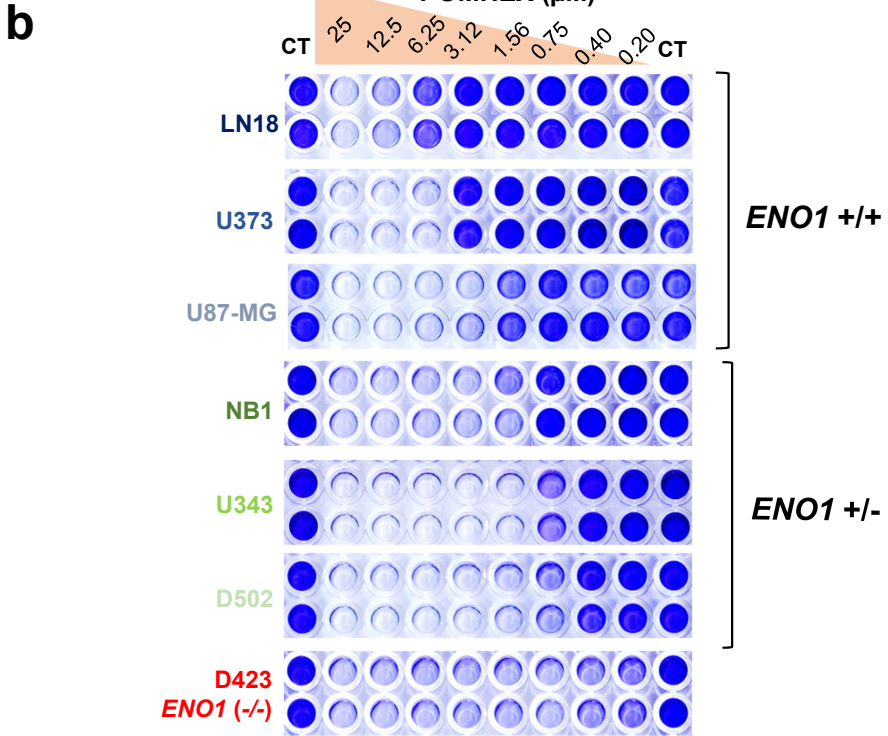

| Cell Line | IC <sub>50</sub> (nM) | EN01 status |
|-----------|-----------------------|-------------|
| LN18      | 14,235 ± 1641         | +/+         |
| U373      | 2,802 ± 488           | +/+         |
| U87-MG    | 2,100 ± 339           | +/+         |
| A1207     | 1,355 ± 191           | +/+         |
| NB1       | 696 ± 38              | +/-         |
| U343      | 644 ± 143             | +/-         |
| D502      | 72 ± 4                | +/-         |
| D423      | 66 ± 8                | -/-         |

**Supplementary Figure S3. *ENO1*-deletion status modulates sensitivity to POMHEX.** **a.** *ENO1*-deleted (D423, red), *ENO1*-isogenically rescued (D423 *ENO1*, blue), and *ENO1*-WT (LN319, grey) cells were treated POMHEX in RPMI media under the same experimental conditions used for NCI-60 screening. Note that the sensitivity to POMHEX in RPMI is ~3-fold greater than in DMEM media. The relative terminal cell density of the mean +/- S.D. of 60 cells lines screened by the NCI-60 shown in green (data replotted from NSC784584; attached as **Supplementary Note 2**). **b.** Crystal violet stained plates of common glioma cell lines treated with a serial dilution of POMHEX (N = 2 biological replicates), with a summary of IC<sub>50</sub> values. **c.** Live cell imaging incucyte confluency curves, (x-axis, time; y-axis, confluence: 0 to 100%) for representative *ENO1*-WT, *ENO1*-heterozygous deleted and *ENO1*-homozygous deleted glioma cell lines. Each box represents one biological replicate. Positive slopes indicate proliferating cells, flat slopes indicate cells in stasis, and negative slopes correspond to dying cells. Note the distinct negative slopes in *ENO1*-deleted D423 cells.

# Supplementary Figure S4

**a** POMHEX: 1 hr pulsed every 48 hrs

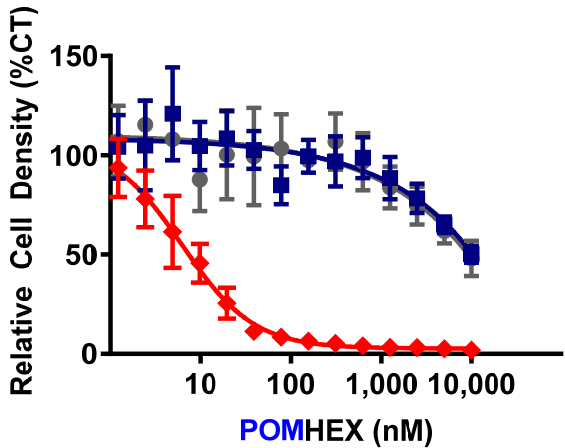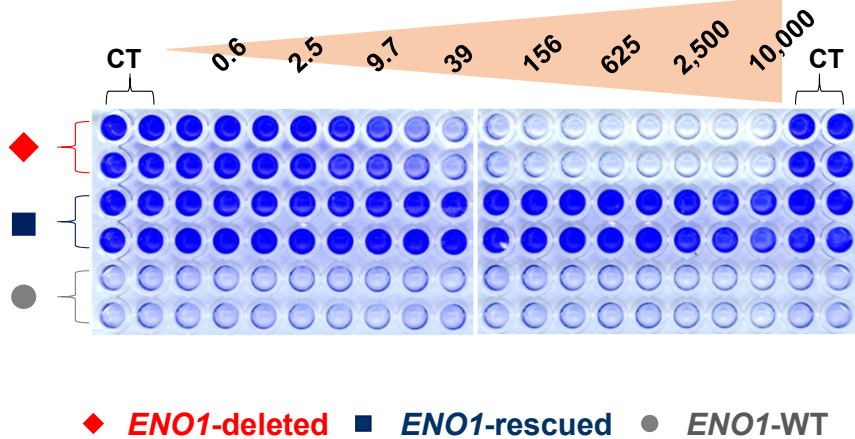

**b** POMHEX: continuous exposure for 48 hrs

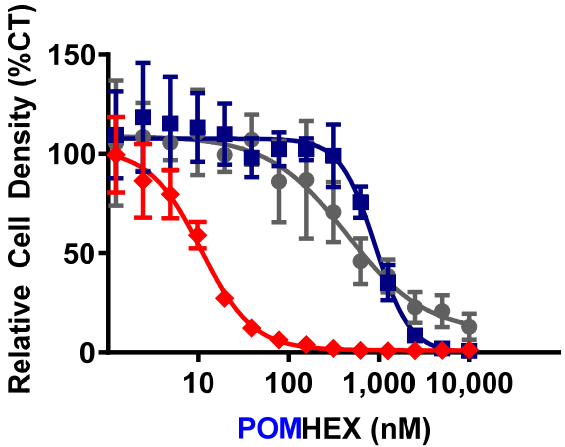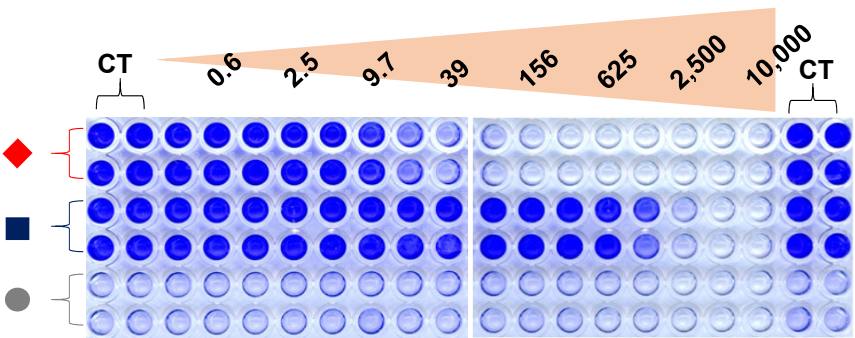



**Supplementary Figure S4. Short pulse or continuous treatment with POMHEX results in similar levels of potency against *ENO1*-deleted glioma cells.** **a.** Pulsed drug treatment. *ENO1*-deleted (D423, red), *ENO1*-isogenically rescued (D423 *ENO1*, blue), and *ENO1*-WT (LN319, grey) cells were treated POMHEX at the doses indicated (x-axis). Cells were exposed to media (DMEM, 10% FBS) containing POMHEX at the concentrations indicated for 1 hr. The drug-containing media was then removed and replaced with fresh, non-drug containing media. This was repeated every 48 hrs., until one week elapsed. Plates were then fixed and cell density quantified by crystal violet. **b.** For continuous POMHEX exposure experiments, experimental conditions were the same as in panel a, except that the drug-containing media was left on and only changed every 48 hrs. Cell density after 1-week total exposure was determined by crystal violet staining and expressed relative to non-drug contain controls. For both a and b, mean of n = 6 experiments  $\pm$  S.D. is shown. The  $IC_{50}$  for continuous versus pulsed exposures for *ENO1*-deleted glioma cells were essentially the same ( $\sim 10$  nM). The non-target *ENO1*-rescued and *ENO1*-WT glioma cells were substantially less affected by pulsed versus continuous POMHEX ( $IC_{50}$   $\sim 1,500$  nM vs  $\sim 6,000$  nM, and  $\sim 500$  nM vs  $\sim 4,500$  nM for D423 *ENO1* rescued and LN319 *ENO1*-WT respectively).

Supplementary Figure S5

a

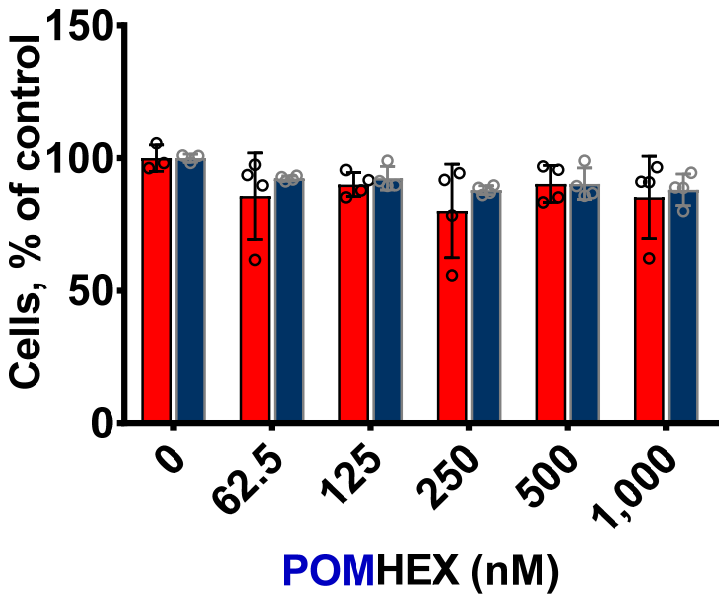

b

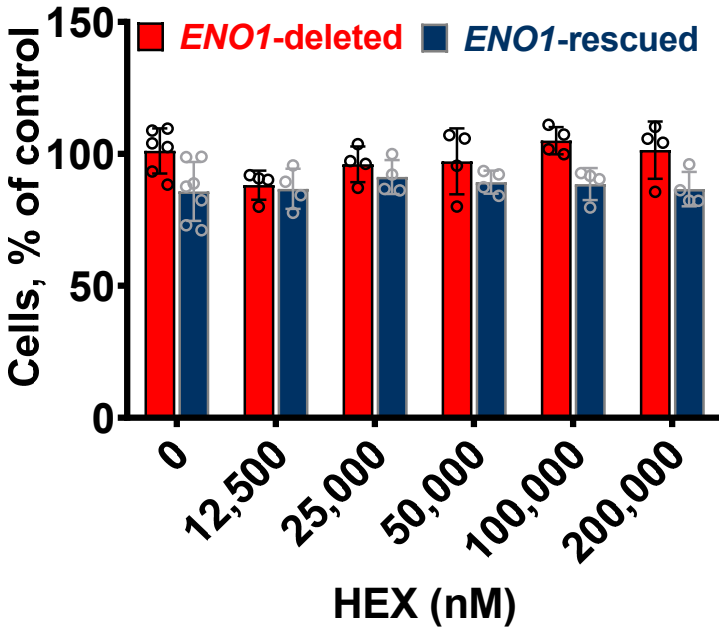

**Supplementary Figure S5. ECAR inhibition is not due to decreased cell viability.** Viability of cell populations at the end of the Seahorse experiment for HEX and POMHEX are unchanged. Thus, differences in ECAR and OCAR cannot be explained by cell number changes. Individual data points and the mean  $\pm$  S.D. for POMHEX-treated [N=3(CT), 4(treatments)], and for HEX-treated [N=6 *ENO1*-deleted and 7 for *ENO1*-rescued (CT), 4 (treatments)]. Biological replicates are shown.

# Supplementary Figure S6

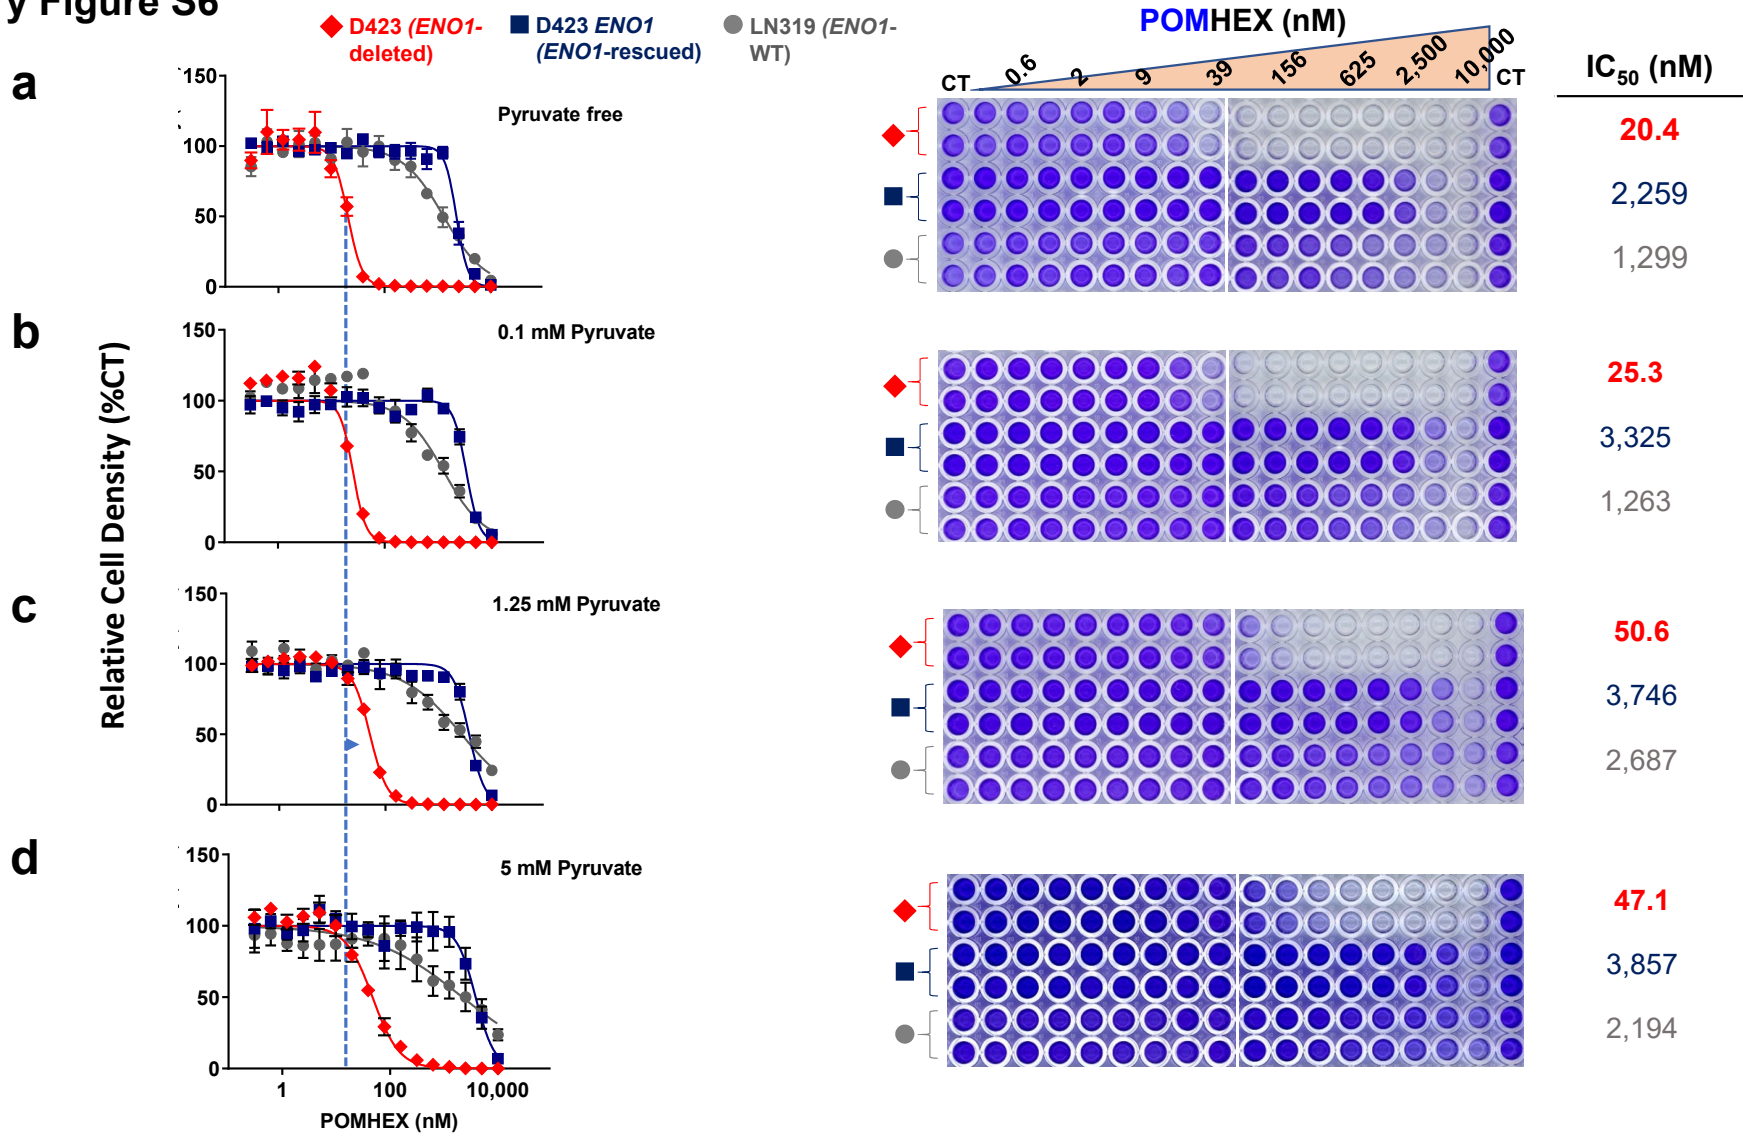

**Supplementary Figure S6. Exogenous pyruvate modestly attenuates sensitivity to POMHEX.** *ENO1*-deleted (D423, red), *ENO1*-isogenically rescued (D423 *ENO1*, blue), and *ENO1*-WT (LN319, grey) cells were treated POMHEX at the doses indicated (x-axis) in media (DMEM) either free of pyruvate (a), with 0.1 mM (b), 1.25 mM (c) or 5 mM pyruvate (d). Pyruvate levels in human blood are around 0.05 mM. Cell density after 5 days exposure was determined by crystal violet staining and expressed relative to non-drug contain controls. Mean +/- S.E.M and n = 4 experiments are indicated. The experiment was independently replicated once. The IC<sub>50</sub> for pyruvate-free media is indicated by a dashed line, for comparison. Exogenous pyruvate supplementation, even at supraphysiological levels, exerts a modest effect on sensitivity to Enolase inhibitors. Saturable transport through monocarboxylate transporters may limit the efficacy of this rescue (see Extended Figure 8).

# Supplementary Figure S7

## POMHEX 20 mpk IV

| Time point | RBC<br>^6uL | HGB<br>g/dL | HCT<br>%    | MCV<br>fL | MCHC<br>g/dL | MCH<br>pg | RDW<br>% | RET%<br>% | RETI<br>^9/L | PLT<br>^3uL | WBC<br>^3uL | NEUT<br>^3uL | LYMP<br>^3uL | MONO<br>^3uL | EOSO<br>^3uL | BASO<br>^3uL | LUC<br>^3uL |
|------------|-------------|-------------|-------------|-----------|--------------|-----------|----------|-----------|--------------|-------------|-------------|--------------|--------------|--------------|--------------|--------------|-------------|
| Pre-dose   | 5.27        | 14.0        | <b>44.2</b> | 83.7      | 31.8         | 26.6      | 13.2     | 1.0       | 54.8         | 505         | 15.24       | 8.17         | 6.25         | 0.56         | 0.11         | 0.03         | 0.13        |
| 24hr Post  | 4.90        | 12.9        | <b>41.1</b> | 83.9      | 31.4         | 26.3      | 13.2     | 1.2       | 58.3         | 494         | 16.44       | 8.24         | 7.10         | 0.74         | 0.07         | 0.02         | 0.27        |

## POMHEX 40 mpk IV

| Time point | RBC<br>^6uL | HGB<br>g/dL | HCT<br>%    | MCV<br>fL | MCHC<br>g/dL | MCH<br>pg | RDW<br>% | RET%<br>% | RETI<br>^9/L | PLT<br>^3uL | WBC<br>^3uL | NEUT<br>^3uL | LYMP<br>^3uL | MONO<br>^3uL | EOSO<br>^3uL | BASO<br>^3uL | LUC<br>^3uL |
|------------|-------------|-------------|-------------|-----------|--------------|-----------|----------|-----------|--------------|-------------|-------------|--------------|--------------|--------------|--------------|--------------|-------------|
| Pre dose   | 5.45        | 12.0        | <b>37.2</b> | 68.2      | 32.2         | 22.0      | 13.7     | 3.0       | 164.7        | 418         | 9.52        | 5.32         | 3.86         | 0.20         | 0.08         | 0.01         | 0.05        |
| 24-Hour    | 5.69        | 12.4        | <b>39.2</b> | 68.8      | 31.8         | 21.9      | 13.6     | 2.8       | 156.8        | 470         | 20.42       | 18.86        | 1.11         | 0.39         | 0.01         | 0.01         | 0.05        |

## HEX 100 mpk SC

| Time point | RBC<br>^6uL | HGB<br>g/dL | HCT<br>%    | MCV<br>fL | MCHC<br>g/dL | MCH<br>pg | RDW<br>% | RET%<br>% | RETI<br>^9/L | PLT<br>^3uL | WBC<br>^3uL | NEUT<br>^3uL | LYMP<br>^3uL | MONO<br>^3uL | EOSO<br>^3uL | BASO<br>^3uL | LUC<br>^3uL |
|------------|-------------|-------------|-------------|-----------|--------------|-----------|----------|-----------|--------------|-------------|-------------|--------------|--------------|--------------|--------------|--------------|-------------|
| Pre-Dose   | 5.52        | 13.3        | <b>41.6</b> | 75.3      | 32.0         | 24.1      | 13.4     | ND        | ND           | 640         | 16.80       | 5.11         | 10.92        | 0.49         | 0.13         | 0.03         | 0.13        |
| Post Dose  | 4.66        | 11.5        | <b>35.7</b> | 76.6      | 32.2         | 24.7      | 13.5     | ND        | ND           | 596         | 22.46       | 9.23         | 12.37        | 0.53         | 0.08         | 0.03         | 0.21        |

## HEX 200 mpk SC

| Time point | RBC<br>^6uL | HGB<br>g/dL | HCT<br>%    | MCV<br>fL | MCHC<br>g/dL | MCH<br>pg | RDW<br>% | RET%<br>% | RETI<br>^9/L | PLT<br>^3uL | WBC<br>^3uL | NEUT<br>^3uL | LYMP<br>^3uL | MONO<br>^3uL | EOSO<br>^3uL | BASO<br>^3uL | LUC<br>^3uL |
|------------|-------------|-------------|-------------|-----------|--------------|-----------|----------|-----------|--------------|-------------|-------------|--------------|--------------|--------------|--------------|--------------|-------------|
| Pre-dose   | 4.93        | 13.2        | <b>42.0</b> | 85.1      | 31.5         | 26.8      | 13.5     | 1.8       | 86.9         | 560         | 11.99       | 3.89         | 7.41         | 0.34         | 0.14         | 0.02         | 0.20        |
| 24 hour    | 4.48        | 11.9        | <b>38.2</b> | 85.4      | 31.1         | 26.6      | 13.4     | 2.1       | 93.1         | 504         | 15.76       | 9.98         | 4.94         | 0.62         | 0.03         | 0.01         | 0.18        |

## BenzylHEX 200 mpk SC

| Time point | RBC<br>^6uL | HGB<br>g/dL | HCT<br>%    | MCV<br>fL | MCHC<br>g/dL | MCH<br>pg | RDW<br>% | RET%<br>% | RETI<br>^9/L | PLT<br>^3uL | WBC<br>^3uL | NEUT<br>^3uL | LYMP<br>^3uL | MONO<br>^3uL | EOSO<br>^3uL | BASO<br>^3uL | LUC<br>^3uL |
|------------|-------------|-------------|-------------|-----------|--------------|-----------|----------|-----------|--------------|-------------|-------------|--------------|--------------|--------------|--------------|--------------|-------------|
| Pre-dose   | 5.58        | 13.4        | <b>40.9</b> | 73.3      | 32.9         | 24.1      | 15.1     | 1.2       | 68.7         | 409         | 11.51       | 7.12         | 3.76         | 0.44         | 0.10         | 0.01         | 0.08        |
| 24 Hour    | 5.15        | 12.3        | <b>37.7</b> | 73.3      | 32.7         | 24.0      | 15.3     | 1.0       | 49.2         | 351         | 14.52       | 6.86         | 6.86         | 0.49         | 0.15         | 0.02         | 0.15        |

| Code    | Name                                      |
|---------|-------------------------------------------|
| WBC     | White Blood Cell                          |
| # NEUT  | Neutrophil Count                          |
| # LYM   | Lymphocyte Count                          |
| # MONO  | Monocyte Count                            |
| # EOS   | Eosinophil Count                          |
| # BASO  | Basophil Count                            |
| # LUC   | Large Unstained Cells                     |
| # RETIC | Reticulocyte Count                        |
| RBC     | Red Blood Cell                            |
| HGB     | Hemoglobin Concentration                  |
| HCT     | Hematocrit                                |
| MCV     | Mean Corpuscular Volume                   |
| MCH     | Mean Corpuscular Hemoglobin               |
| MCHC    | Mean Corpuscular Hemoglobin Concentration |
| PLT     | Platelet Count                            |
| MPV     | Mean Platelet Volume                      |

**Supplementary Figure S7. Nominal hematology parameters in NHP when dosed with Enolase inhibitor at concentrations higher-than-required for therapeutic efficacy.** Male cynomolgus monkeys were fasted overnight and IV injected with either a single bolus dose of POMHEX or SC for HEX and BenzylHEX (inactive synthetic precursor; negative control). Blood was collected for PK measurements at time intervals (Figure 7), and a final blood draw, 24 h after dosing was used for veterinary panel hematology profiling. All experiments were performed at Charles River Laboratories on different individual animals. Minimal, non-dose-dependent decreases in hematocrit and RBC were observed in animals post-treatment with both POMHEX with HEX, which Charles River veterinary pathologists attribute to repeated blood draws for PK. In corroboration, similar decreases in hematocrit were observed post-treatment with inactive BenzylHEX. The data agree with the findings in mice (Supplementary Figure S2) and indicate minimal haemopoietic toxicity of HEX and POMHEX.

# Supplementary Figure S8

## Blood chemistry HEX 100 mpk SC/day

Accession : Hematology / Clinical Chemistry of Samples from CRL-Shrewsbury Study 20243814 Tested on 3-Mar-2020 :Chemistry

| Time Point | Animal # | Analysis Sample ID | ALT U/L | ALB g/dL | A/G ratio | ALP U/L | AST U/L | CA mg/dL | CL mEqL | CHOL mg/dL | CK U/L | CREA mg/dL | GGT U/L | GLOB g/dL | GLUC mg/dL | PHOS mg/dL | K mEqL | NA mEqL | TBIL mg/dL | TP g/dL | TRIG mg/dL | UREA mg/dL | SAQB | Weight Kg |
|------------|----------|--------------------|---------|----------|-----------|---------|---------|----------|---------|------------|--------|------------|---------|-----------|------------|------------|--------|---------|------------|---------|------------|------------|------|-----------|
| Pre dose   | 1001     | 20243814-01        | 70      | 4.1      | 2.0       | 616     | 49      | 9.8      | 108     | 164        | 237    | 0.5        | 38      | 2.0       | 91         | 6.4        | 4.0    | 146     | 0.06       | 6.1     | 62         | 19         | N    | 3.03      |
| 24 hr post | 1001     | 20243814-02        | 92      | 4.2      | 2.3       | 619     | 55      | 9.6      | 102     | 168        | 618    | 0.5        | 40      | 1.8       | 90         | 7.1        | 4.3    | 139     | 0.11       | 6.0     | 31         | 14         | N    | N         |
| 48 hr post | 1001     | 20243814-03        | 95      | 4.4      | 2.3       | 605     | 44      | 9.7      | 104     | 189        | 328    | 0.5        | 40      | 1.9       | 109        | 7.3        | 4.4    | 142     | 0.24       | 6.3     | 28         | 18         | N    | N         |
| 72 hr post | 1001     | 20243814-04        | 86      | 4.4      | 1.9       | 570     | 32      | 10.2     | 103     | 184        | 315    | 0.5        | 38      | 2.3       | 100        | 6.2        | 4.6    | 142     | 0.25       | 6.7     | 24         | 16         | N    | 2.96      |

## Hematology HEX 100 mpk SC/day

Accession : Hematology / Clinical Chemistry of Samples from CRL-Shrewsbury Study 20243814 Tested on 3-Mar-2020 :Hematology

| Time Point | Animal # | Analysis Sample ID | RBC ^6uL | HGB g/dL | HCT %       | MCV fL | MCHC g/dL | MCH pg | RDW % | RETI ^9/L | PLT ^3uL | WBC ^3uL | NEUT ^3uL | LYMP ^3uL | MONO ^3uL | EOSO ^3uL | BASO ^3uL | LUC ^3uL |
|------------|----------|--------------------|----------|----------|-------------|--------|-----------|--------|-------|-----------|----------|----------|-----------|-----------|-----------|-----------|-----------|----------|
| Pre dose   | 1001     | 20243814-01        | 5.64     | 13.6     | <b>41.9</b> | 74.3   | 32.6      | 24.2   | 14.7  | 71.3      | 464      | 8.69     | 1.36      | 7.06      | 0.16      | 0.06      | 0.01      | 0.04     |
| 24 hr post | 1001     | 20243814-02        | 5.16     | 12.9     | <b>38.8</b> | 75.3   | 33.2      | 25.0   | 14.7  | 72.6      | 399      | 6.58     | 2.64      | 3.84      | 0.06      | 0.01      | 0.01      | 0.02     |
| 48 hr post | 1001     | 20243814-03        | 5.21     | 13.0     | <b>38.4</b> | 73.8   | 33.7      | 24.9   | 14.6  | 66.0      | 431      | 7.55     | 2.25      | 5.05      | 0.18      | 0.02      | 0.00      | 0.04     |
| 72 hr post | 1001     | 20243814-04        | 5.16     | 12.5     | <b>38.3</b> | 74.3   | 32.5      | 24.1   | 14.3  | 99.1      | 436      | 9.03     | 1.62      | 7.09      | 0.22      | 0.03      | 0.01      | 0.06     |



**Supplementary Figure S8. No obvious systemic toxicities or anemia with repeated HEX treatment in NHP.** Blood chemistry and hematology veterinary panels were performed at Charles River Laboratories on the same animal profiled for HEX levels in plasma in Figure 7, with daily 100 mg/kg SC injections. Times indicated are in reference to the first injection. The values for hematocrit (**bold**) were plotted in Figure 7. No obvious increases in blood chemistry parameters indicative of hepatotoxicity (ALT, AST), nephrotoxicity (CREA, Urea), myotoxicity (CK, ALP). Hematological parameters were also normal, except for the initial decrease in hematocrit, which is attributed to multiple blood draws for pharmacology.

**Supplementary Note 1 . Synthesis of (1-hydroxy-2-oxopiperidin-3-yl) phosphonic acid, (HEX)**

**Synthesis of (1-hydroxy-2-oxopiperidin-3-yl) phosphonic acid HEX (1) CAS: 2004714-32-1**

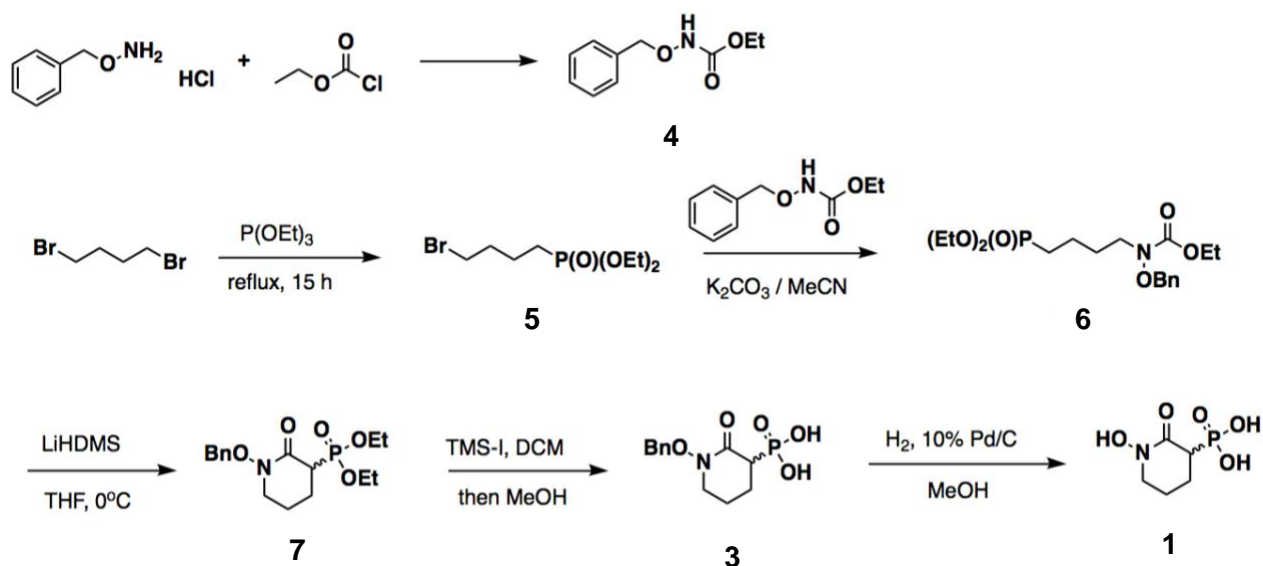

**Step 1: Synthesis of ethyl benzyloxycarbamate (4).** A mixture of O-benzylhydroxylamine hydrochloride (1.6 g, 10 mmol) and pyridine (5 mL) was stirred at RT for 2 h under N<sub>2</sub>. This was then cooled to 0°C. Next, ethyl carbonochloridate (1.1 g, 10 mmol) was added and the mixture was stirred at RT for 2 h. The reaction mixture was then diluted with EtOAc (60 mL), washed with 2N HCl (30 mL x 3) and aq NaHCO<sub>3</sub> (30 mL x 2), dried over sodium sulfate, filtered and concentrated to yield ethyl benzyloxycarbamate **3** as a yellow oil (1.7 g, 87%). MS (ES+) C<sub>10</sub>H<sub>13</sub>NO<sub>3</sub> requires: 195, found 196 [M+H]<sup>+</sup>.

**Step 2: Synthesis of diethyl 4-bromobutylphosphonate (5).** Triethyl phosphite (30.0 g, 181 mmol) was slowly added to 1, 4-dibromobutane (117 g, 542 mmol) at 90°C. Then the mixture was stirred at 90°C overnight. The mixture was purified by silica gel column using gradient elution (DCM/MeOH: 0-8%) to yield the diethyl 4-bromobutylphosphonate **5** as a light-yellow oil (30 g, 61%). MS (ES+) C<sub>8</sub>H<sub>18</sub>BrO<sub>3</sub>P requires: 272, found 273 [M+H]<sup>+</sup>.

**Step 3: Synthesis of ethyl benzyloxy(4-(diethoxyphosphoryl)butyl)carbamate (6).** A mixture of diethyl 4-bromobutylphosphonate (1.7 g, 6.2 mmol), ethyl benzyloxycarbamate (1.1 g, 5.6 mmol, **3**) and potassium carbonate (3.9 g, 28 mmol) in MeCN (20 mL) was stirred at 90 °C overnight. The solvent was removed under reduced pressure. The residue was diluted with water (60 mL), extracted with DCM (2 x 50 mL). The combined organic extracts were washed with brine (100 mL), dried over sodium sulfate, filtered and concentrated to give a yellow oil. The oil was purified by silica gel column using gradient elution (DCM/MeOH: 0-5%, 5-8%) to afford ethyl benzyloxy(4-(diethoxyphosphoryl)butyl)carbamate **6** as a yellow oil (1.8 g, 83%). MS (ES+) C<sub>18</sub>H<sub>30</sub>NO<sub>6</sub>P requires: 387, found 388 [M+H]<sup>+</sup>.

**Step 4: Synthesis of diethyl 1-(benzyloxy)-2-oxopiperidin-3-ylphosphonate (7).** To a solution of ethyl benzyloxy(4-(diethoxyphosphoryl)butyl)carbamate (1.16 g, 3 mmol, **6**) in THF (10 mL) at 0°C, LiHMDS (1M solution in THF, 9 mL, 9 mmol) was slowly added. The mixture was stirred at 0°C for 3 h under N<sub>2</sub>. Then, the reaction was quenched at 0°C with 10% aq. AcOH (10mL) and solvent was removed under reduced pressure. The residue was dissolved in EtOAc (100mL), washed with brine (50 mL), dried over sodium sulfate, filtered and concentrated to give a yellow oil. The oil was purified by silica gel column using gradient elution (DCM/MeOH = 0-8%) to afford diethyl 1-(benzyloxy)-2-oxopiperidin-3-ylphosphonate **7** as a yellow oil (850 mg, 83%). MS (ES+) C<sub>16</sub>H<sub>24</sub>NO<sub>5</sub>P requires: 341, found 342 [M+H]<sup>+</sup>. <sup>1</sup>H NMR (300 MHz, CDCl<sub>3</sub>) δ 7.46-7.31 (m, 5H), 4.91 (q, *J*=10.81, 10.81, 15.36 Hz, 2H), 4.14 (m, 4H), 3.29 (m, 2H), 2.98 (dt, *J*=25.80 Hz, 1H), 2.08 (m, 2H), 1.90 (m, 1H), 1.68 (m, 1H), 1.33 (t, *J*=7.0, 7.0 Hz, 6H). <sup>13</sup>C NMR (75 MHz, CDCl<sub>3</sub>) δ 163.09 (d, *J*=5.41 Hz, 1C), 135.85, 130.19 (s, 2C), 129.18, 128.93 (s, 2C), 76.38, 63.55 (d, *J*=6.84 Hz, 1C), 62.70 (d, *J*=6.84 Hz, 1C), 51.39, 42.71 (d, *J*=136.97, 1C), 23.24 (d, *J*=4.76, 1C), 22.32 (d, *J*=7.48, 1C), 16.97 (d, *J*=6.12, 1C), 16.84 (d, *J*=6.12, 1C). <sup>31</sup>P NMR (121 MHz, CDCl<sub>3</sub>) δ 23.83.

**Step 5: Synthesis of 1-(benzyloxy)-2-oxopiperidin-3-ylphosphonic acid (3).** To a solution of diethyl 1-(benzyloxy)-2-oxopiperidin-3-ylphosphonate (3.41 g, 10 mmol, **7**) in DCM (30 mL) at 0°C, iodotrimethylsilane (6.0 g, 30 mmol) was slowly added. The mixture

was stirred at RT for 4 h. Next, MeOH (40 mL) was added and the solvent was removed. The aforementioned step was repeated twice. Then, the residue was purified by preparative HPLC to yield 1-(benzyloxy)-2-oxopiperidin-3-ylphosphonic acid **3** as a yellow solid (1.7 g, 60%). MS (ES+) C<sub>12</sub>H<sub>16</sub>NO<sub>5</sub>P requires: 285, found 286 [M+H]<sup>+</sup>. **<sup>1</sup>H NMR** (300 MHz, D<sub>2</sub>O) δ 7.56-7.48 (m, 5H), 4.97 (q, *J*=6.48, 10.32, 10.43 Hz, 2H), 3.54 (t, *J*=6.22, 6.22 Hz, 2H), 2.86 (dt, *J*=24.08 Hz, 1H), 2.10 (m, *J*=4.80, 6.10, 6.47, 6.79 Hz, 1H), 1.97 (m, *J*=5.92, 6.24, 6.31, 6.40, 8.25 Hz, 1H), 1.79 (m, *J*=5.76, 5.92, 6.24, 6.56, 6.31 Hz, 1H). **<sup>13</sup>C NMR** (75 MHz, D<sub>2</sub>O) δ 166.24 (d, *J*=5.49 Hz, 1C), 134.38, 130.00 (s, 2C), 129.22, 128.84 (s, 2C), 75.76, 50.23, 42.18 (d, *J*=129.09, 1C), 22.12 (d, *J*=6.44, 1C), 21.24 (d, *J*=7.81, 1C). **<sup>31</sup>P NMR** (121 MHz, D<sub>2</sub>O) δ 17.02 (m, *J*=12.10, 12.10, 17.84, 17.84 Hz).

**Step 6: Synthesis of (1-hydroxy-2-oxopiperidin-3-yl) phosphonic acid—HEX (1).** To a solution of 1-(benzyloxy)-2-oxopiperidin-3-ylphosphonic acid (0.8 g, 2.80 mmol, **8**) dissolved in MeOH (10 mL), palladium on carbon was added (10%, 80 mg). Next, the resulting mixture was hydrogenated at 5 psi at RT for 1 h in a Parr apparatus. Then, the catalyst was removed by filtering through Celite ®. The filtrate was concentrated to yield (1-hydroxy-2-oxopiperidin-3-yl) phosphonic acid **HEX (1)** as a light-yellow oil (0.54 g, 98%). MS (ES+) C<sub>5</sub>H<sub>10</sub>NO<sub>5</sub>P requires: 195, found 196 [M+H]<sup>+</sup>. MS (ES-) C<sub>5</sub>H<sub>10</sub>NO<sub>5</sub>P requires: 195, found 194 [M-H]<sup>-</sup>. **<sup>1</sup>H NMR** (300 MHz, D<sub>2</sub>O) δ 3.52 (m, 2H), 2.72 (dt, *J*=24.24, 1H), 2.09 (m, 1H), 1.92 (m, 2H), 1.77 (m, *J*=7.21, 6.32, 6.25, 6.09, 5.93, 5.38 Hz, 1H). **<sup>1</sup>H (<sup>31</sup>P decoupled) NMR** (300 MHz, D<sub>2</sub>O) δ 3.61 (m, 2H), 3.02 (t, *J*=6.35, 6.49 Hz, 1H), 2.15-1.86 (m, 4H). **<sup>13</sup>C NMR** (75 MHz, D<sub>2</sub>O) δ 165.07 (d, *J*=6.10 Hz, 1C), 51.55, 41.48 (d, *J*=130.59 Hz, 1C), 22.05 (d, *J*=4.05 Hz, 1C), 21.05 (d, *J*=8.17 Hz, 1C). **<sup>31</sup>P NMR** (121 MHz, D<sub>2</sub>O) δ 20.53 (m, *J*=11.59, 13.04, 14.18, 14.49 Hz, 1P). **<sup>31</sup>P (<sup>1</sup>H decoupled) NMR** (121 MHz, D<sub>2</sub>O) δ 20.77 (s, 1P).

**Synthesis of (((1-hydroxy-2-oxopiperidin-3-yl)phosphoryl)bis(oxy))bis(methylene) bis(2,2-dimethylpropanoate) POMHEX (2) CAS: 2004714-34-3**

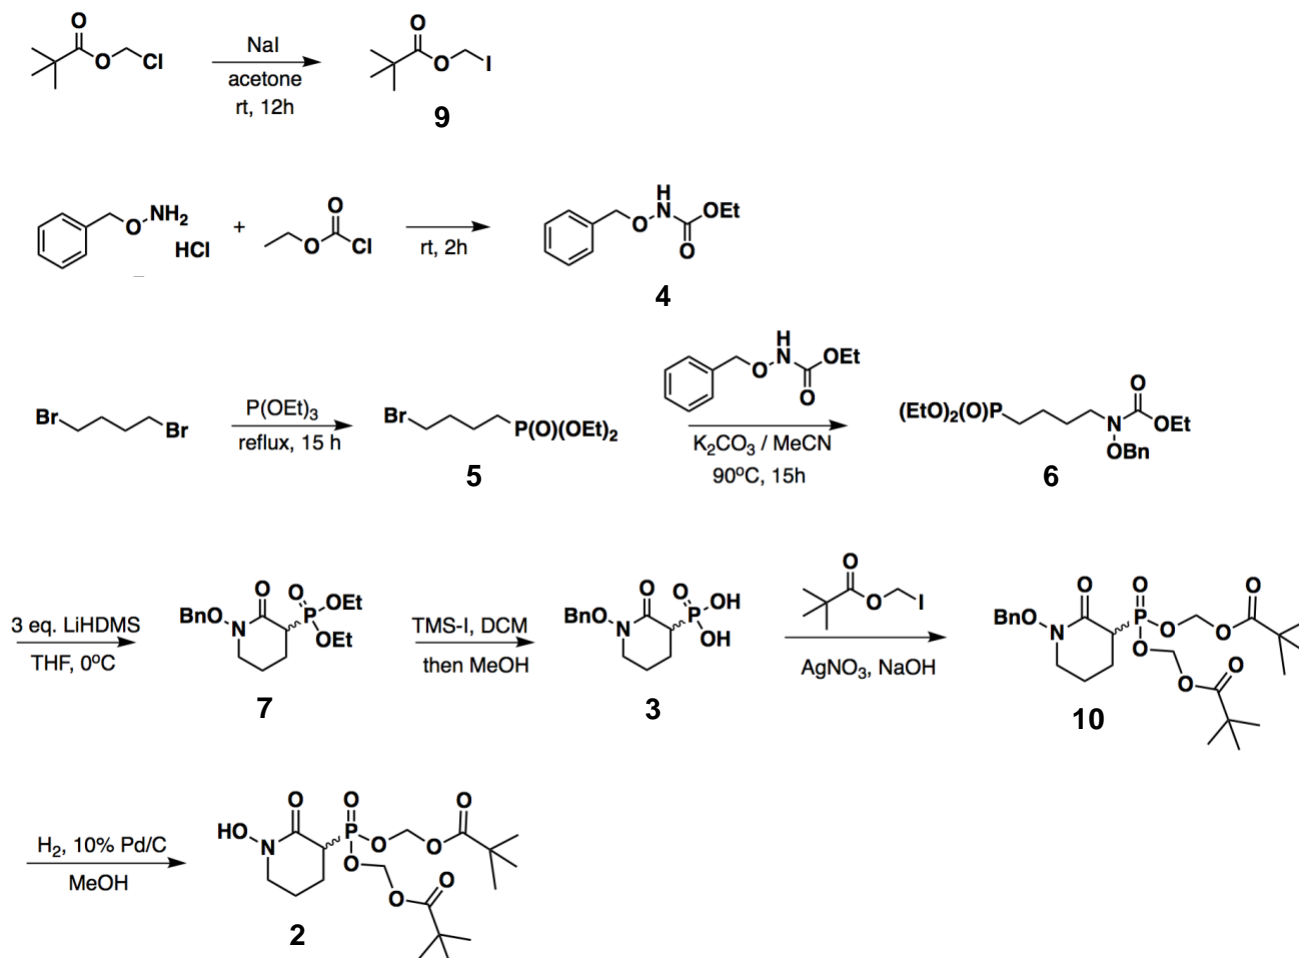

**Step 1: Synthesis of iodomethyl pivalate (9).** A mixture of chloromethyl pivalate (30 g, 199 mmol, **7**) and sodium iodide (60 g, 400 mmol) in acetone (250 mL) was stirred vigorously in a foil covered flask for 12 h at RT. The mixture was filtered, and the salts were rinsed with acetone (50 mL) and concentrated. Then, the residue was dissolved in ether (250 mL) and transferred to a separatory funnel. The organic phase was then washed with 10 % aqueous sodium hydrogen sulfite (3 x 50 mL) followed by brine (1 x 50 mL), dried (Na<sub>2</sub>SO<sub>4</sub>), filtered, and concentrated affording iodomethyl pivalate **9** as a light-yellow liquid (43.8 g, 91%). <sup>1</sup>H NMR (300 MHz, CDCl<sub>3</sub>) δ 1.2 (s, 9H), 5.9 (s, 2H).

The synthetic route (steps 2-6) towards POMHEX follows the synthesis of HEX up to intermediate (3).

**Step 7: Synthesis of (((1-(benzyloxy)-2-oxopiperidin-3-yl)phosphoryl)bis(oxy))bis(methylene) bis(2,2-dimethylpropanoate) (10).** To a solution of (1-(benzyloxy)-2-oxopiperidin-3-yl)phosphonic acid (1 g, 3.51 mmol **3**) in water (17.53 ml), sodium hydroxide (0.280 g, 7.01 mmol) was added. The mixture was stirred at 25°C for 1 h. Once the solution reached an alkaline pH (~9), a solution of silver nitrate (1.787 g, 10.52 mmol) in water (4 mL) was added and the resulting mixture was stirred at 25°C for 2 h. Then, the solid was collected by vacuum filtration and rinsed with cold water (50 mL) and ether (25 mL) and dried under vacuum. The resulting solid was added to a solution of iodomethyl pivalate **9** (1.867 g, 7.71 mmol) in toluene (17.53 ml). The mixture was stirred at 25°C for 6 h. After filtration, the filtrate was concentrated and purified via silica gel chromatography using gradient elution (EtOAc/hexanes: 20-100%), which yielded (((1-(benzyloxy)-2-oxopiperidin-3-yl)phosphoryl)bis(oxy))bis(methylene) bis(2,2-dimethylpropanoate) **10** as a light-yellow oil (1.08 g, 60%). MS (ES+) C<sub>24</sub>H<sub>36</sub>NO<sub>9</sub>P requires: 513, found 514 [M+H]<sup>+</sup>. <sup>1</sup>H NMR (300 MHz, CDCl<sub>3</sub>) δ 7.43-7.5 (m, 2H), 7.33-7.41 (m, 3H), 5.7-5.9 (m, 4H), 4.96 (s, 2H), 3.27-3.4 (m, 2H), 3.15 (dt, *J*=26.13, 7.0 Hz, 1H), 1.96-2.1 (m, 3H), 1.71 (m, 1H), 1.25 (s, 9H), 1.24 (s, 9H). <sup>13</sup>C NMR (75 MHz, CDCl<sub>3</sub>) δ 177.01 (s, 2C), 162.42 (d, *J*=5.21 Hz, 1C), 135.74, 130.34 (s, 2C), 129.34, 129.10 (s, 2C), 81.34 (d, *J*=5.74 Hz, 1C), 76.58, 51.34, 42.85 (d, *J*=142.65 Hz, 1C), 39.36 (s, 2C), 27.47 (s, 3C), 27.45 (s, 3C), 22.98 (d, *J*=4.71 Hz, 1C), 22.75 (d, *J*=10.98 Hz, 1C). <sup>31</sup>P NMR (121 MHz, CDCl<sub>3</sub>) δ 23.30.

**Step 8: Synthesis of (((1-hydroxy-2-oxopiperidin-3-yl)phosphoryl)bis(oxy))bis(methylene) bis(2,2-dimethylpropanoate)—POMHEX (2).** To a solution of (((1-(benzyloxy)-2-oxopiperidin-3-yl)phosphoryl)bis(oxy))bis(methylene) bis(2,2-dimethylpropanoate) **10** (0.8 g, 1.55 mmol) dissolved in MeOH (10 mL), palladium on carbon was added (10%, 80 mg). Next, the resulting mixture was hydrogenated at 5 psi at RT for 1 h in a Parr apparatus. Then, the catalyst was removed by filtering through Celite. The filtrate was concentrated to yield (((1-hydroxy-2-oxopiperidin-3-yl)phosphoryl)bis(oxy))bis

(methylene) bis(2,2-dimethylpropanoate) **POMHEX (2)** as a light-yellow oil (0.65 g, 98%). MS (ES+) C<sub>17</sub>H<sub>30</sub>NO<sub>9</sub>P requires: 423, found 424 [M+H]<sup>+</sup>. **<sup>1</sup>H NMR** (300 MHz, CDCl<sub>3</sub>) δ 5.76 (dd, J=12.76 Hz, 1H), 5.72-5.55 (m, 3H), 3.59 (m, 2H), 3.10 (dt, J=26.39 Hz, 1H), 2.15 (m, 1H), 2.05 (m, 2H), 1.84 (m, 1H), 1.21 (s, 9H), 1.20 (s, 9H). **<sup>1</sup>H (<sup>31</sup>P decoupled) NMR** (300 MHz, CDCl<sub>3</sub>) δ 5.77 (d, J=5.17 Hz, 1H), 5.71-5.66 (m, 3H), 3.59 (m, 2H), 3.14 (t, J=7.48, 7.17 Hz, 1H), 2.15 (m, 1H), 2.09 (m, 2H), 1.88 (m, 1H), 1.21 (s, 9H), 1.20 (s, 9H). **<sup>13</sup>C NMR** (75 MHz, CDCl<sub>3</sub>) δ 177.70, 177.69, 159.84 (s, J=5.39 Hz, 1C), 83.27 (d, J=5.67 Hz, 1C), 82.43 (d, J=6.49 Hz, 1C) 49.42, 41.13 (d, J=143.71 Hz, 1C), 23.06 (d, J=4.40 Hz), 22.16 (d, J=10.59 Hz, 1C), 22.61 (s, 3C), 22.61 (s, 3C). **<sup>31</sup>P NMR** (121 MHz, C<sub>6</sub>D<sub>6</sub>) δ 22.75 (m, 1P). **<sup>31</sup>P (<sup>1</sup>H decoupled) NMR** (121 MHz, CDCl<sub>3</sub>) δ 22.83 (s, 1P).



## **Supplementary Note 2. POMHEX NCI-60**

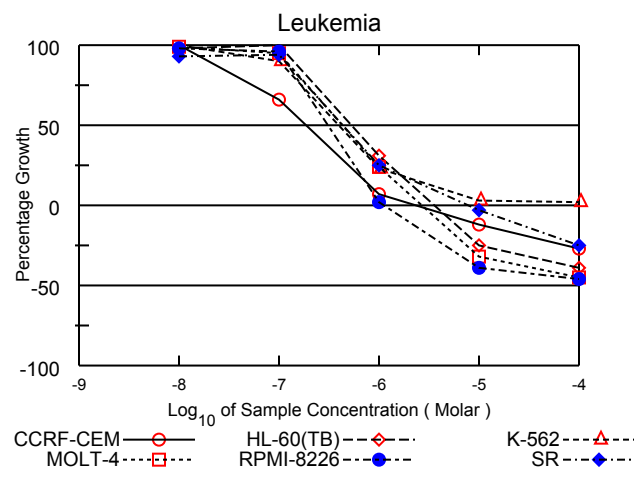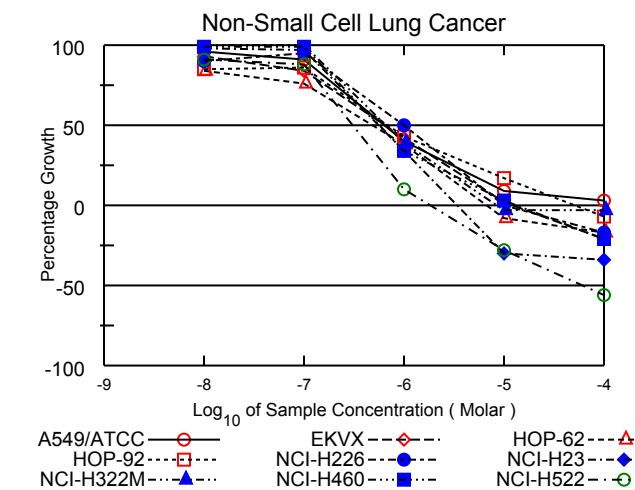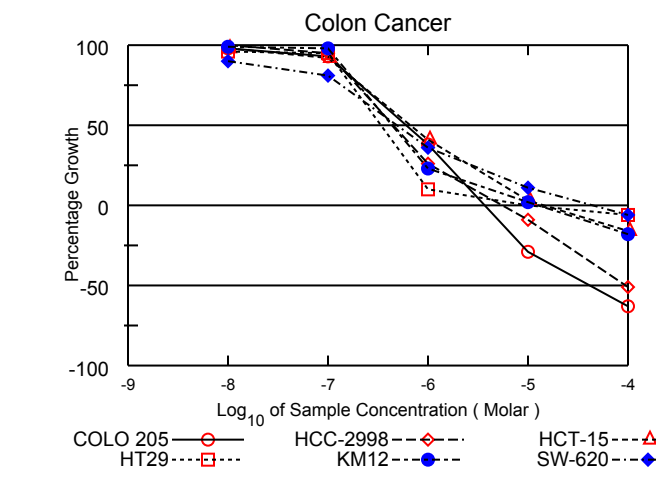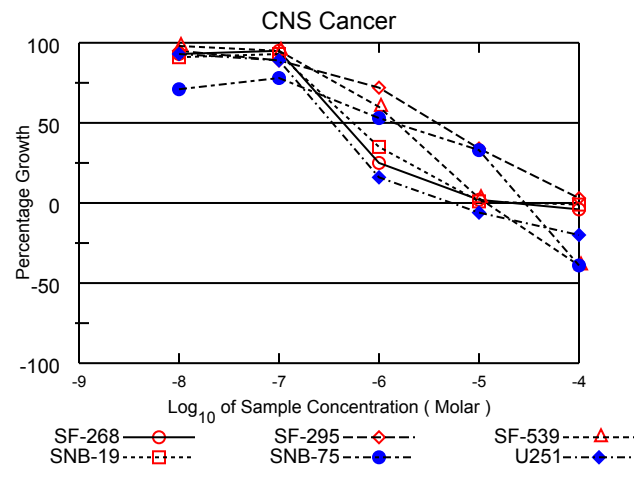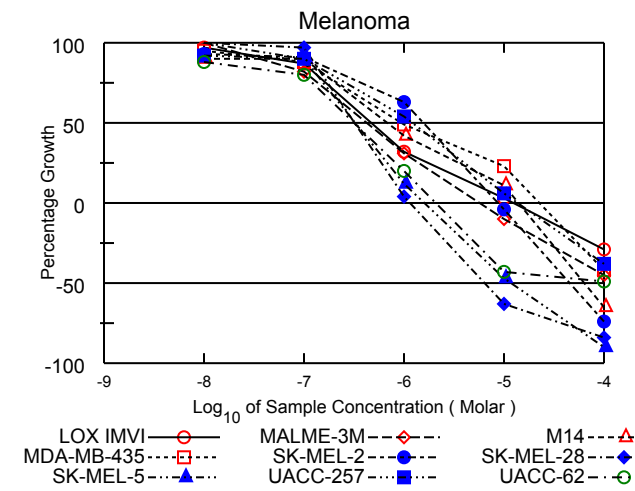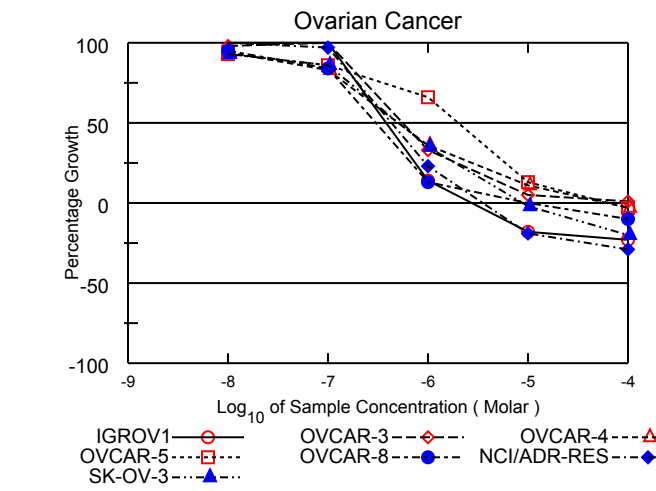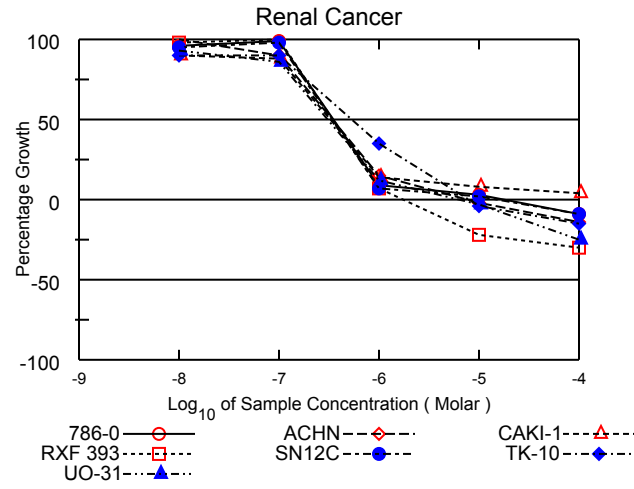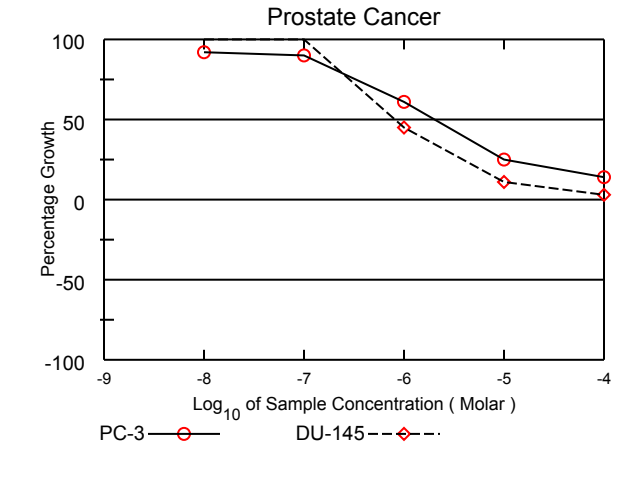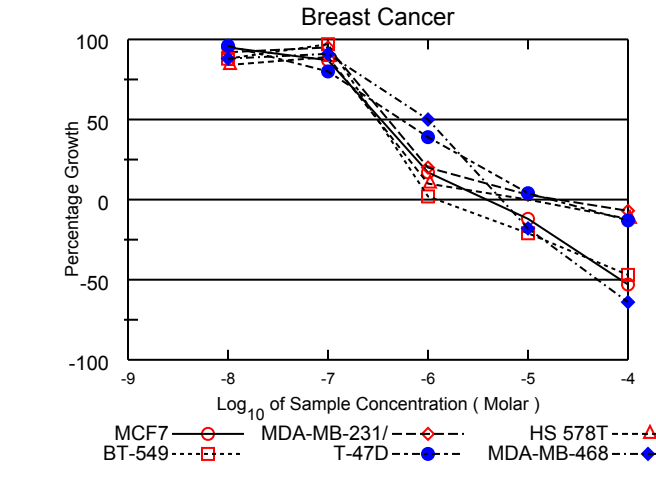

# National Cancer Institute Developmental Therapeutics Program In-Vitro Testing Results

|                                |                                       |                |               |
|--------------------------------|---------------------------------------|----------------|---------------|
| NSC : D - 784584 / 1           | Experiment ID : 1507NS15              | Test Type : 08 | Units : Molar |
| Report Date : January 19, 2017 | Test Date : July 06, 2015             | QNS :          | MC :          |
| COMI : POMHEX                  | Stain Reagent : SRB Dual-Pass Related | SSPL : 0ZOT    |               |

| Panel/Cell Line                   | Log10 Concentration |       |       |       |       |       |       |      |      |      |      |      | GI50    | TGI       | LC50      |
|-----------------------------------|---------------------|-------|-------|-------|-------|-------|-------|------|------|------|------|------|---------|-----------|-----------|
|                                   | Time Zero           | Ctrl  | -8.0  | -7.0  | -6.0  | -5.0  | -4.0  | -8.0 | -7.0 | -6.0 | -5.0 | -4.0 |         |           |           |
| <b>Leukemia</b>                   |                     |       |       |       |       |       |       |      |      |      |      |      |         |           |           |
| CCRF-CEM                          | 0.692               | 2.635 | 2.633 | 1.970 | 0.829 | 0.607 | 0.508 | 100  | 66   | 7    | -12  | -27  | 1.85E-7 | 2.30E-6   | > 1.00E-4 |
| HL-60(TB)                         | 0.841               | 2.702 | 2.657 | 2.754 | 1.410 | 0.629 | 0.517 | 98   | 103  | 31   | -25  | -39  | 5.38E-7 | 3.53E-6   | > 1.00E-4 |
| K-562                             | 0.295               | 2.251 | 2.244 | 2.052 | 0.741 | 0.357 | 0.336 | 100  | 90   | 23   | 3    | 2    | 3.93E-7 | > 1.00E-4 | > 1.00E-4 |
| MOLT-4                            | 0.637               | 2.604 | 2.581 | 2.506 | 1.109 | 0.434 | 0.352 | 99   | 95   | 24   | -32  | -45  | 4.31E-7 | 2.69E-6   | > 1.00E-4 |
| RPMI-8226                         | 0.825               | 2.421 | 2.394 | 2.354 | 0.858 | 0.501 | 0.449 | 98   | 96   | 2    | -39  | -46  | 3.08E-7 | 1.12E-6   | > 1.00E-4 |
| SR                                | 0.433               | 1.955 | 1.843 | 1.866 | 0.811 | 0.421 | 0.325 | 93   | 94   | 25   | -3   | -25  | 4.33E-7 | 7.87E-6   | > 1.00E-4 |
| <b>Non-Small Cell Lung Cancer</b> |                     |       |       |       |       |       |       |      |      |      |      |      |         |           |           |
| A549/ATCC                         | 0.461               | 2.330 | 2.260 | 2.167 | 1.208 | 0.628 | 0.510 | 96   | 91   | 40   | 9    | 3    | 6.37E-7 | > 1.00E-4 | > 1.00E-4 |
| EKVX                              | 0.686               | 2.323 | 2.205 | 2.063 | 1.380 | 0.723 | 0.543 | 93   | 84   | 42   | 2    | -21  | 6.57E-7 | 1.25E-5   | > 1.00E-4 |
| HOP-62                            | 0.802               | 1.652 | 1.517 | 1.447 | 1.127 | 0.736 | 0.667 | 84   | 76   | 38   | -8   | -17  | 4.87E-7 | 6.63E-6   | > 1.00E-4 |
| HOP-92                            | 1.384               | 2.280 | 2.149 | 2.157 | 1.771 | 1.532 | 1.292 | 85   | 86   | 43   | 17   | -7   | 6.95E-7 | 5.15E-5   | > 1.00E-4 |
| NCI-H226                          | 0.817               | 2.021 | 1.904 | 1.956 | 1.418 | 0.810 | 0.675 | 90   | 95   | 50   | .    | -17  | 9.96E-7 | 9.62E-6   | > 1.00E-4 |
| NCI-H23                           | 0.712               | 2.210 | 2.179 | 2.164 | 1.228 | 0.496 | 0.468 | 98   | 97   | 34   | -30  | -34  | 5.64E-7 | 3.40E-6   | > 1.00E-4 |
| NCI-H322M                         | 0.574               | 1.616 | 1.631 | 1.641 | 0.982 | 0.557 | 0.558 | 101  | 102  | 39   | -3   | -3   | 6.73E-7 | 8.50E-6   | > 1.00E-4 |
| NCI-H460                          | 0.322               | 3.214 | 3.192 | 3.184 | 1.294 | 0.399 | 0.254 | 99   | 99   | 34   | 3    | -21  | 5.61E-7 | 1.29E-5   | > 1.00E-4 |
| NCI-H522                          | 0.945               | 2.777 | 2.604 | 2.559 | 1.129 | 0.680 | 0.420 | 91   | 88   | 10   | -28  | -56  | 3.08E-7 | 1.83E-6   | 6.28E-5   |
| <b>Colon Cancer</b>               |                     |       |       |       |       |       |       |      |      |      |      |      |         |           |           |
| COLO 205                          | 0.441               | 1.712 | 1.689 | 1.625 | 0.920 | 0.311 | 0.163 | 98   | 93   | 38   | -29  | -63  | 6.00E-7 | 3.64E-6   | 4.09E-5   |
| HCC-2998                          | 0.472               | 1.803 | 1.855 | 1.736 | 0.815 | 0.431 | 0.231 | 104  | 95   | 26   | -9   | -51  | 4.46E-7 | 5.59E-6   | 9.39E-5   |
| HCT-15                            | 0.529               | 2.984 | 2.936 | 2.789 | 1.544 | 0.610 | 0.444 | 98   | 92   | 41   | 3    | -16  | 6.75E-7 | 1.48E-5   | > 1.00E-4 |
| HT29                              | 0.349               | 2.188 | 2.124 | 2.090 | 0.527 | 0.347 | 0.327 | 96   | 95   | 10   | .    | -6   | 3.35E-7 | 8.53E-6   | > 1.00E-4 |
| KM12                              | 0.710               | 3.376 | 3.350 | 3.336 | 1.335 | 0.776 | 0.585 | 99   | 98   | 23   | 2    | -18  | 4.43E-7 | 1.33E-5   | > 1.00E-4 |
| SW-620                            | 0.265               | 1.955 | 1.779 | 1.641 | 0.875 | 0.444 | 0.249 | 90   | 81   | 36   | 11   | -6   | 4.93E-7 | 4.26E-5   | > 1.00E-4 |
| <b>CNS Cancer</b>                 |                     |       |       |       |       |       |       |      |      |      |      |      |         |           |           |
| SF-268                            | 0.682               | 2.237 | 2.124 | 2.166 | 1.070 | 0.709 | 0.655 | 93   | 95   | 25   | 2    | -4   | 4.41E-7 | 2.02E-5   | > 1.00E-4 |
| SF-295                            | 0.986               | 2.876 | 2.786 | 2.671 | 2.355 | 1.637 | 1.048 | 95   | 89   | 72   | 34   | 3    | 3.90E-6 | > 1.00E-4 | > 1.00E-4 |
| SF-539                            | 1.258               | 2.985 | 2.958 | 2.903 | 2.301 | 1.312 | 0.762 | 98   | 95   | 60   | 3    | -39  | 1.52E-6 | 1.18E-5   | > 1.00E-4 |
| SNB-19                            | 0.660               | 2.134 | 2.007 | 2.032 | 1.176 | 0.677 | 0.651 | 91   | 93   | 35   | 1    | -1   | 5.51E-7 | 2.87E-5   | > 1.00E-4 |
| SNB-75                            | 0.955               | 2.064 | 1.738 | 1.821 | 1.544 | 1.321 | 0.579 | 71   | 78   | 53   | 33   | -39  | 1.43E-6 | 2.86E-5   | > 1.00E-4 |
| U251                              | 0.407               | 1.924 | 1.824 | 1.751 | 0.654 | 0.381 | 0.327 | 93   | 89   | 16   | -6   | -20  | 3.41E-7 | 5.22E-6   | > 1.00E-4 |
| <b>Melanoma</b>                   |                     |       |       |       |       |       |       |      |      |      |      |      |         |           |           |
| LOX IMVI                          | 0.258               | 1.921 | 1.876 | 1.703 | 0.784 | 0.307 | 0.183 | 97   | 87   | 32   | 3    | -29  | 4.65E-7 | 1.23E-5   | > 1.00E-4 |
| MALME-3M                          | 0.719               | 1.192 | 1.199 | 1.106 | 0.867 | 0.650 | 0.398 | 101  | 82   | 31   | -10  | -45  | 4.25E-7 | 5.81E-6   | > 1.00E-4 |
| M14                               | 0.435               | 1.857 | 1.712 | 1.713 | 1.039 | 0.599 | 0.151 | 90   | 90   | 42   | 11   | -65  | 6.93E-7 | 1.41E-5   | 6.32E-5   |
| MDA-MB-435                        | 0.448               | 2.645 | 2.532 | 2.379 | 1.530 | 0.953 | 0.259 | 95   | 88   | 49   | 23   | -42  | 9.55E-7 | 2.25E-5   | > 1.00E-4 |
| SK-MEL-2                          | 1.098               | 2.635 | 2.524 | 2.492 | 2.060 | 1.056 | 0.289 | 93   | 91   | 63   | -4   | -74  | 1.55E-6 | 8.76E-6   | 4.58E-5   |
| SK-MEL-28                         | 0.467               | 1.344 | 1.343 | 1.321 | 0.500 | 0.172 | 0.077 | 100  | 97   | 4    | -63  | -84  | 3.21E-7 | 1.14E-6   | 6.34E-6   |
| SK-MEL-5                          | 0.550               | 2.619 | 2.707 | 2.416 | 0.789 | 0.294 | 0.055 | 104  | 90   | 12   | -47  | -90  | 3.24E-7 | 1.58E-6   | 1.20E-5   |
| UACC-257                          | 1.075               | 2.440 | 2.329 | 2.310 | 1.808 | 1.152 | 0.668 | 92   | 90   | 54   | 6    | -38  | 1.19E-6 | 1.35E-5   | > 1.00E-4 |
| UACC-62                           | 0.748               | 2.455 | 2.255 | 2.112 | 1.097 | 0.427 | 0.379 | 88   | 80   | 20   | -43  | -49  | 3.18E-7 | 2.10E-6   | > 1.00E-4 |
| <b>Ovarian Cancer</b>             |                     |       |       |       |       |       |       |      |      |      |      |      |         |           |           |
| IGROV1                            | 0.790               | 2.590 | 2.652 | 2.636 | 1.044 | 0.646 | 0.606 | 103  | 103  | 14   | -18  | -23  | 3.93E-7 | 2.73E-6   | > 1.00E-4 |
| OVCAR-3                           | 0.501               | 1.888 | 1.857 | 1.907 | 0.954 | 0.569 | 0.513 | 98   | 101  | 33   | 5    | 1    | 5.59E-7 | > 1.00E-4 | > 1.00E-4 |
| OVCAR-4                           | 0.595               | 1.395 | 1.344 | 1.259 | 0.885 | 0.681 | 0.577 | 94   | 83   | 36   | 11   | -3   | 5.08E-7 | 5.97E-5   | > 1.00E-4 |
| OVCAR-5                           | 0.953               | 1.849 | 1.785 | 1.720 | 1.546 | 1.066 | 0.923 | 93   | 86   | 66   | 13   | -3   | 2.01E-6 | 6.27E-5   | > 1.00E-4 |
| OVCAR-8                           | 0.501               | 2.267 | 2.182 | 1.992 | 0.735 | 0.498 | 0.449 | 95   | 84   | 13   | .    | -10  | 3.05E-7 | 8.91E-6   | > 1.00E-4 |
| NCI/ADR-RES                       | 0.536               | 1.784 | 1.804 | 1.746 | 0.827 | 0.434 | 0.383 | 102  | 97   | 23   | -19  | -29  | 4.34E-7 | 3.55E-6   | > 1.00E-4 |
| SK-OV-3                           | 0.857               | 2.126 | 2.039 | 1.944 | 1.303 | 0.840 | 0.688 | 93   | 86   | 35   | -2   | -20  | 5.08E-7 | 8.81E-6   | > 1.00E-4 |
| <b>Renal Cancer</b>               |                     |       |       |       |       |       |       |      |      |      |      |      |         |           |           |
| 786-0                             | 1.179               | 2.979 | 2.906 | 2.961 | 1.342 | 1.237 | 1.070 | 96   | 99   | 9    | 3    | -9   | 3.50E-7 | 1.81E-5   | > 1.00E-4 |
| ACHN                              | 0.564               | 2.412 | 2.412 | 2.231 | 0.833 | 0.555 | 0.487 | 100  | 90   | 15   | -2   | -14  | 3.40E-7 | 7.97E-6   | > 1.00E-4 |
| CAKI-1                            | 0.621               | 3.069 | 2.813 | 2.777 | 0.953 | 0.820 | 0.709 | 90   | 88   | 14   | 8    | 4    | 3.24E-7 | > 1.00E-4 | > 1.00E-4 |
| RXF 393                           | 0.947               | 1.697 | 1.681 | 1.725 | 1.000 | 0.737 | 0.659 | 98   | 104  | 7    | -22  | -30  | 3.60E-7 | 1.74E-6   | > 1.00E-4 |
| SN12C                             | 0.653               | 2.242 | 2.161 | 2.206 | 0.759 | 0.677 | 0.597 | 95   | 98   | 7    | 2    | -9   | 3.34E-7 | 1.41E-5   | > 1.00E-4 |
| TK-10                             | 0.816               | 1.816 | 1.719 | 1.713 | 1.169 | 0.786 | 0.690 | 90   | 90   | 35   | -4   | -15  | 5.37E-7 | 8.05E-6   | > 1.00E-4 |
| UO-31                             | 0.783               | 2.212 | 2.117 | 2.009 | 0.955 | 0.761 | 0.588 | 93   | 86   | 12   | -3   | -25  | 3.06E-7 | 6.41E-6   | > 1.00E-4 |
| <b>Prostate Cancer</b>            |                     |       |       |       |       |       |       |      |      |      |      |      |         |           |           |
| PC-3                              | 0.474               | 1.466 | 1.392 | 1.363 | 1.079 | 0.724 | 0.616 | 92   | 90   | 61   | 25   | 14   | 2.02E-6 | > 1.00E-4 | > 1.00E-4 |
| DU-145                            | 0.429               | 1.945 | 1.944 | 1.997 | 1.116 | 0.598 | 0.475 | 100  | 103  | 45   | 11   | 3    | 8.31E-7 | > 1.00E-4 | > 1.00E-4 |
| <b>Breast Cancer</b>              |                     |       |       |       |       |       |       |      |      |      |      |      |         |           |           |
| MCF7                              | 0.571               | 2.887 | 2.768 | 2.594 | 0.960 | 0.504 | 0.267 | 95   | 87   | 17   | -12  | -53  | 3.38E-7 | 3.86E-6   | 8.35E-5   |
| MDA-MB-231/ATCC                   | 0.572               | 1.467 | 1.395 | 1.426 | 0.748 | 0.598 | 0.534 | 92   | 95   | 20   | 3    | -7   | 3.97E-7 | 2.00E-5   | > 1.00E-4 |
| HS 578T                           | 0.984               | 2.098 | 1.918 | 1.980 | 1.098 | 0.975 | 0.863 | 84   | 89   | 10   | .    | -12  | 3.14E-7 | 8.27E-6   | > 1.00E-4 |
| BT-549                            | 0.701               | 1.570 | 1.469 | 1.544 | 0.721 | 0.556 | 0.369 | 88   | 97   | 2    | -21  | -47  | 3.13E-7 | 1.26E-6   | > 1.00E-4 |
| T-47D                             | 0.892               | 1.819 | 1.783 | 1.634 | 1.255 | 0.933 | 0.775 | 96   | 80   | 39   | 4    | -13  | 5.43E-7 | 1.77E-5   | > 1.00E-4 |
| MDA-MB-468                        | 0.579               | 1.181 | 1.109 | 1.125 | 0.878 | 0.478 | 0.207 | 88   | 91   | 50   | -18  | -64  | 9.77E-7 | 5.48E-6   | 4.95E-5   |

Mean Graphs

Report Date :January 19, 2017

Test Date :July 06, 2015

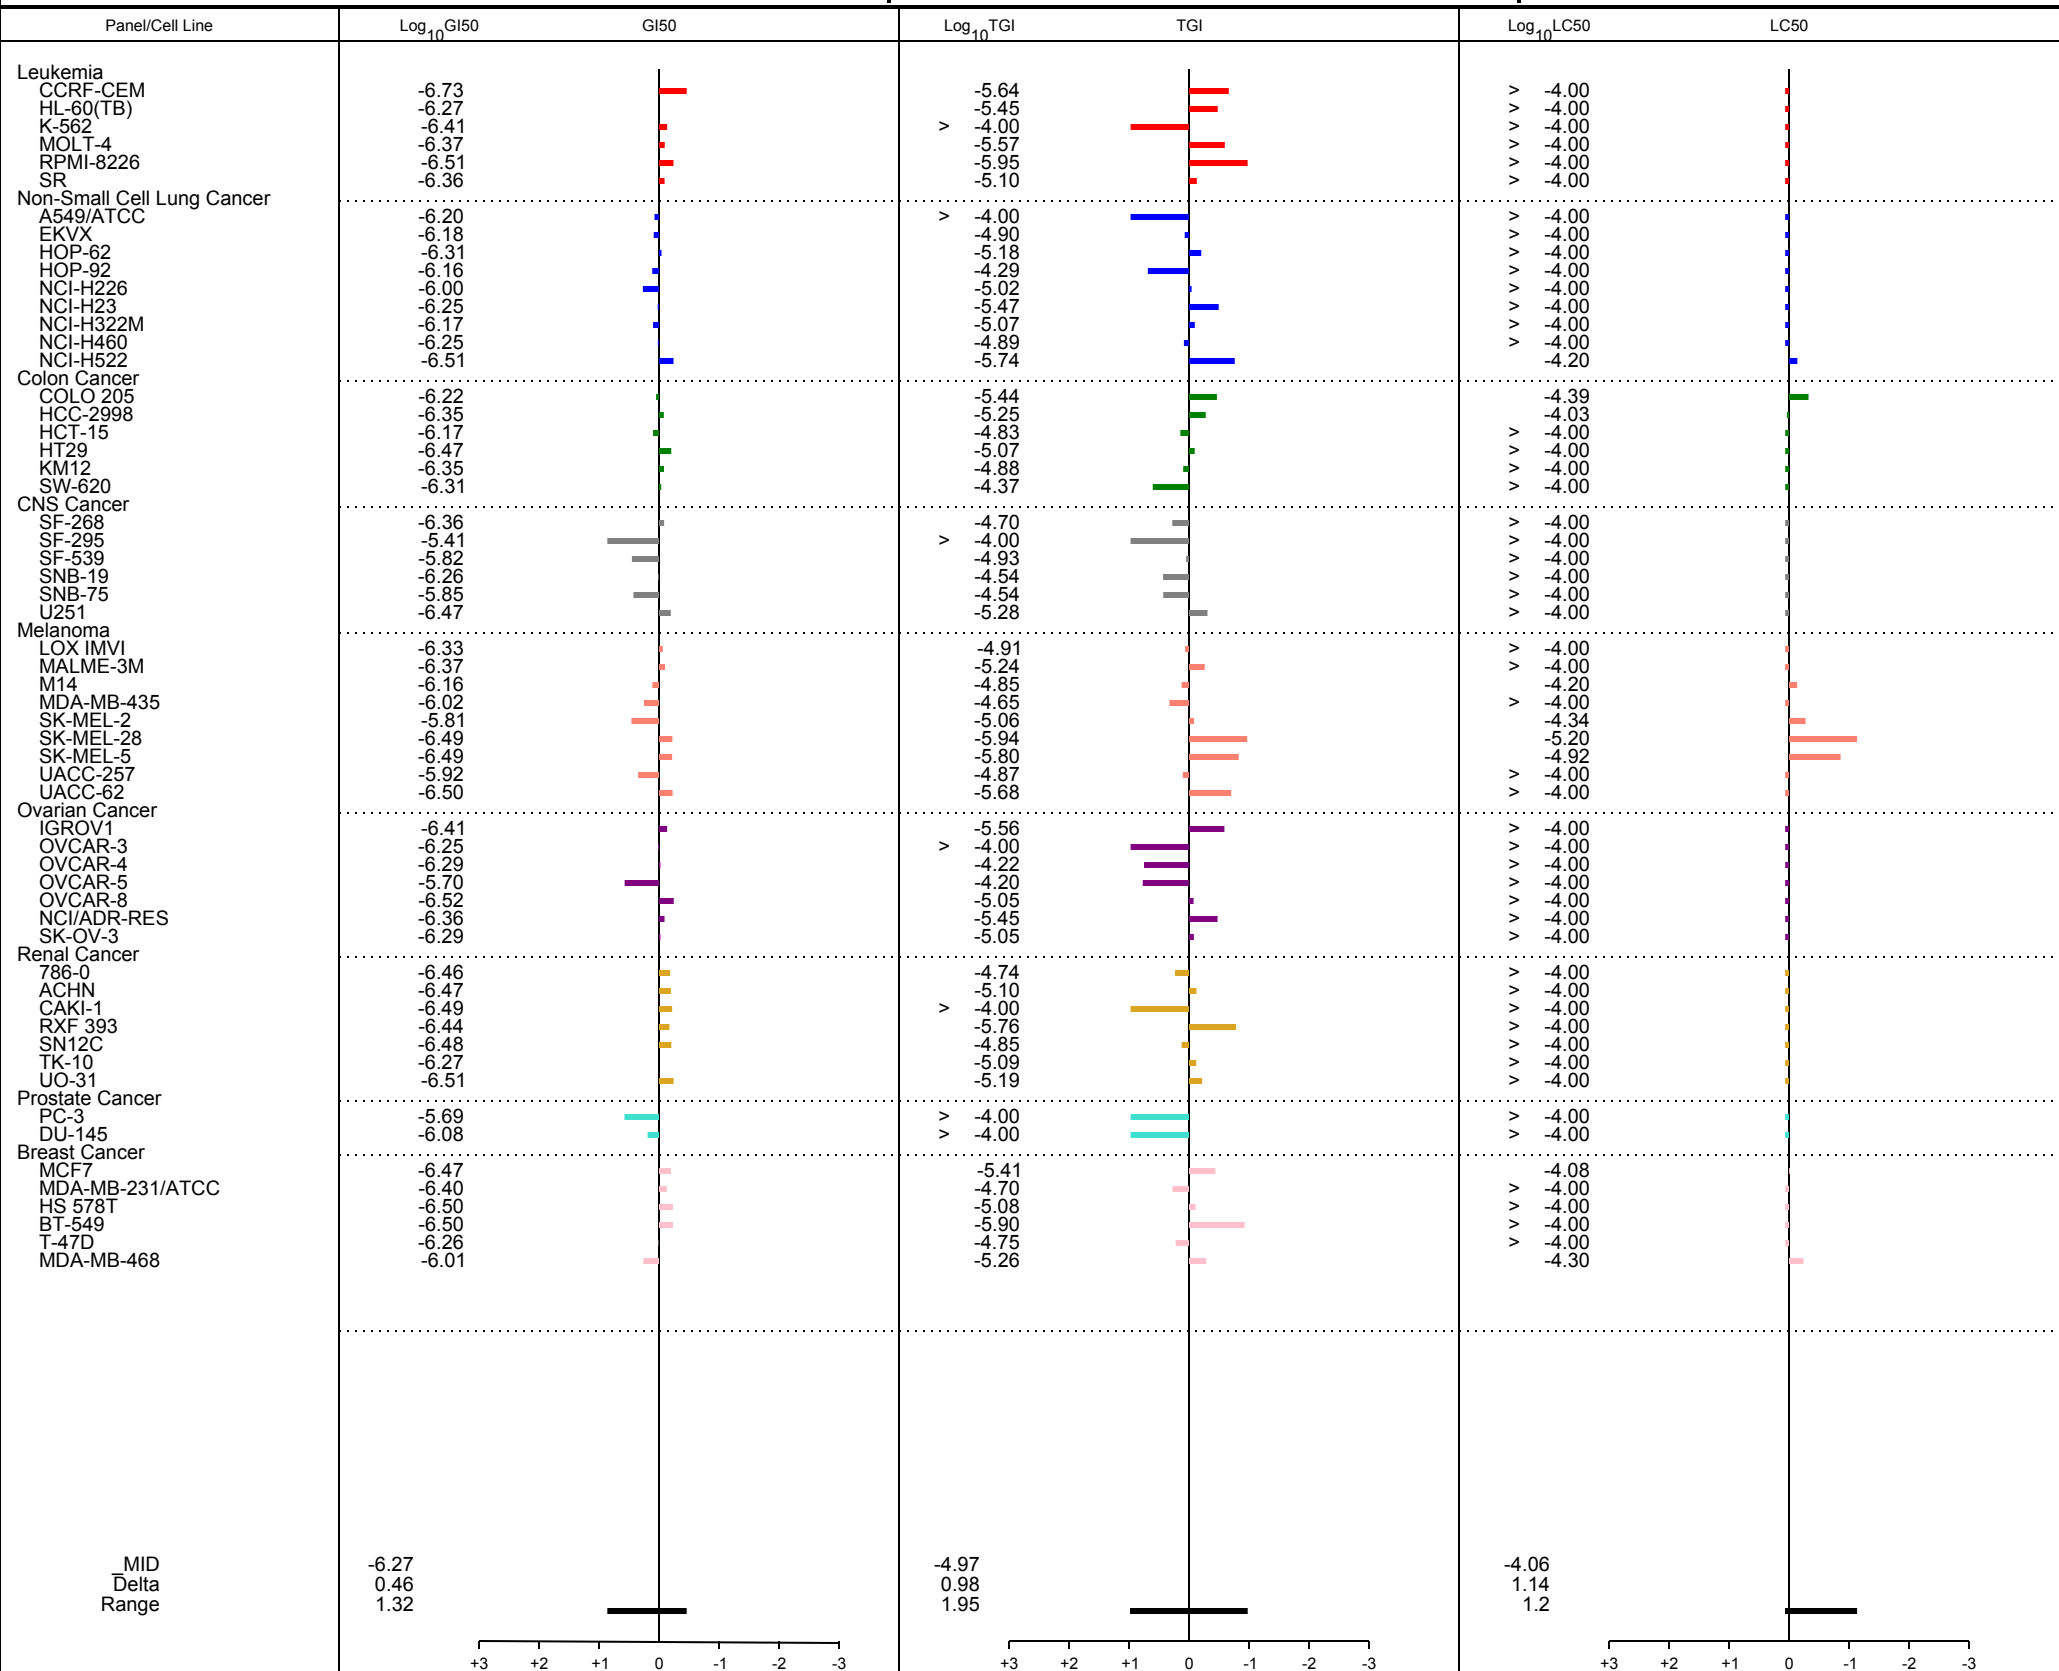

Dose Response Curves

Report Date: January 19, 2017

Test Date: July 06, 2015

All Cell Lines

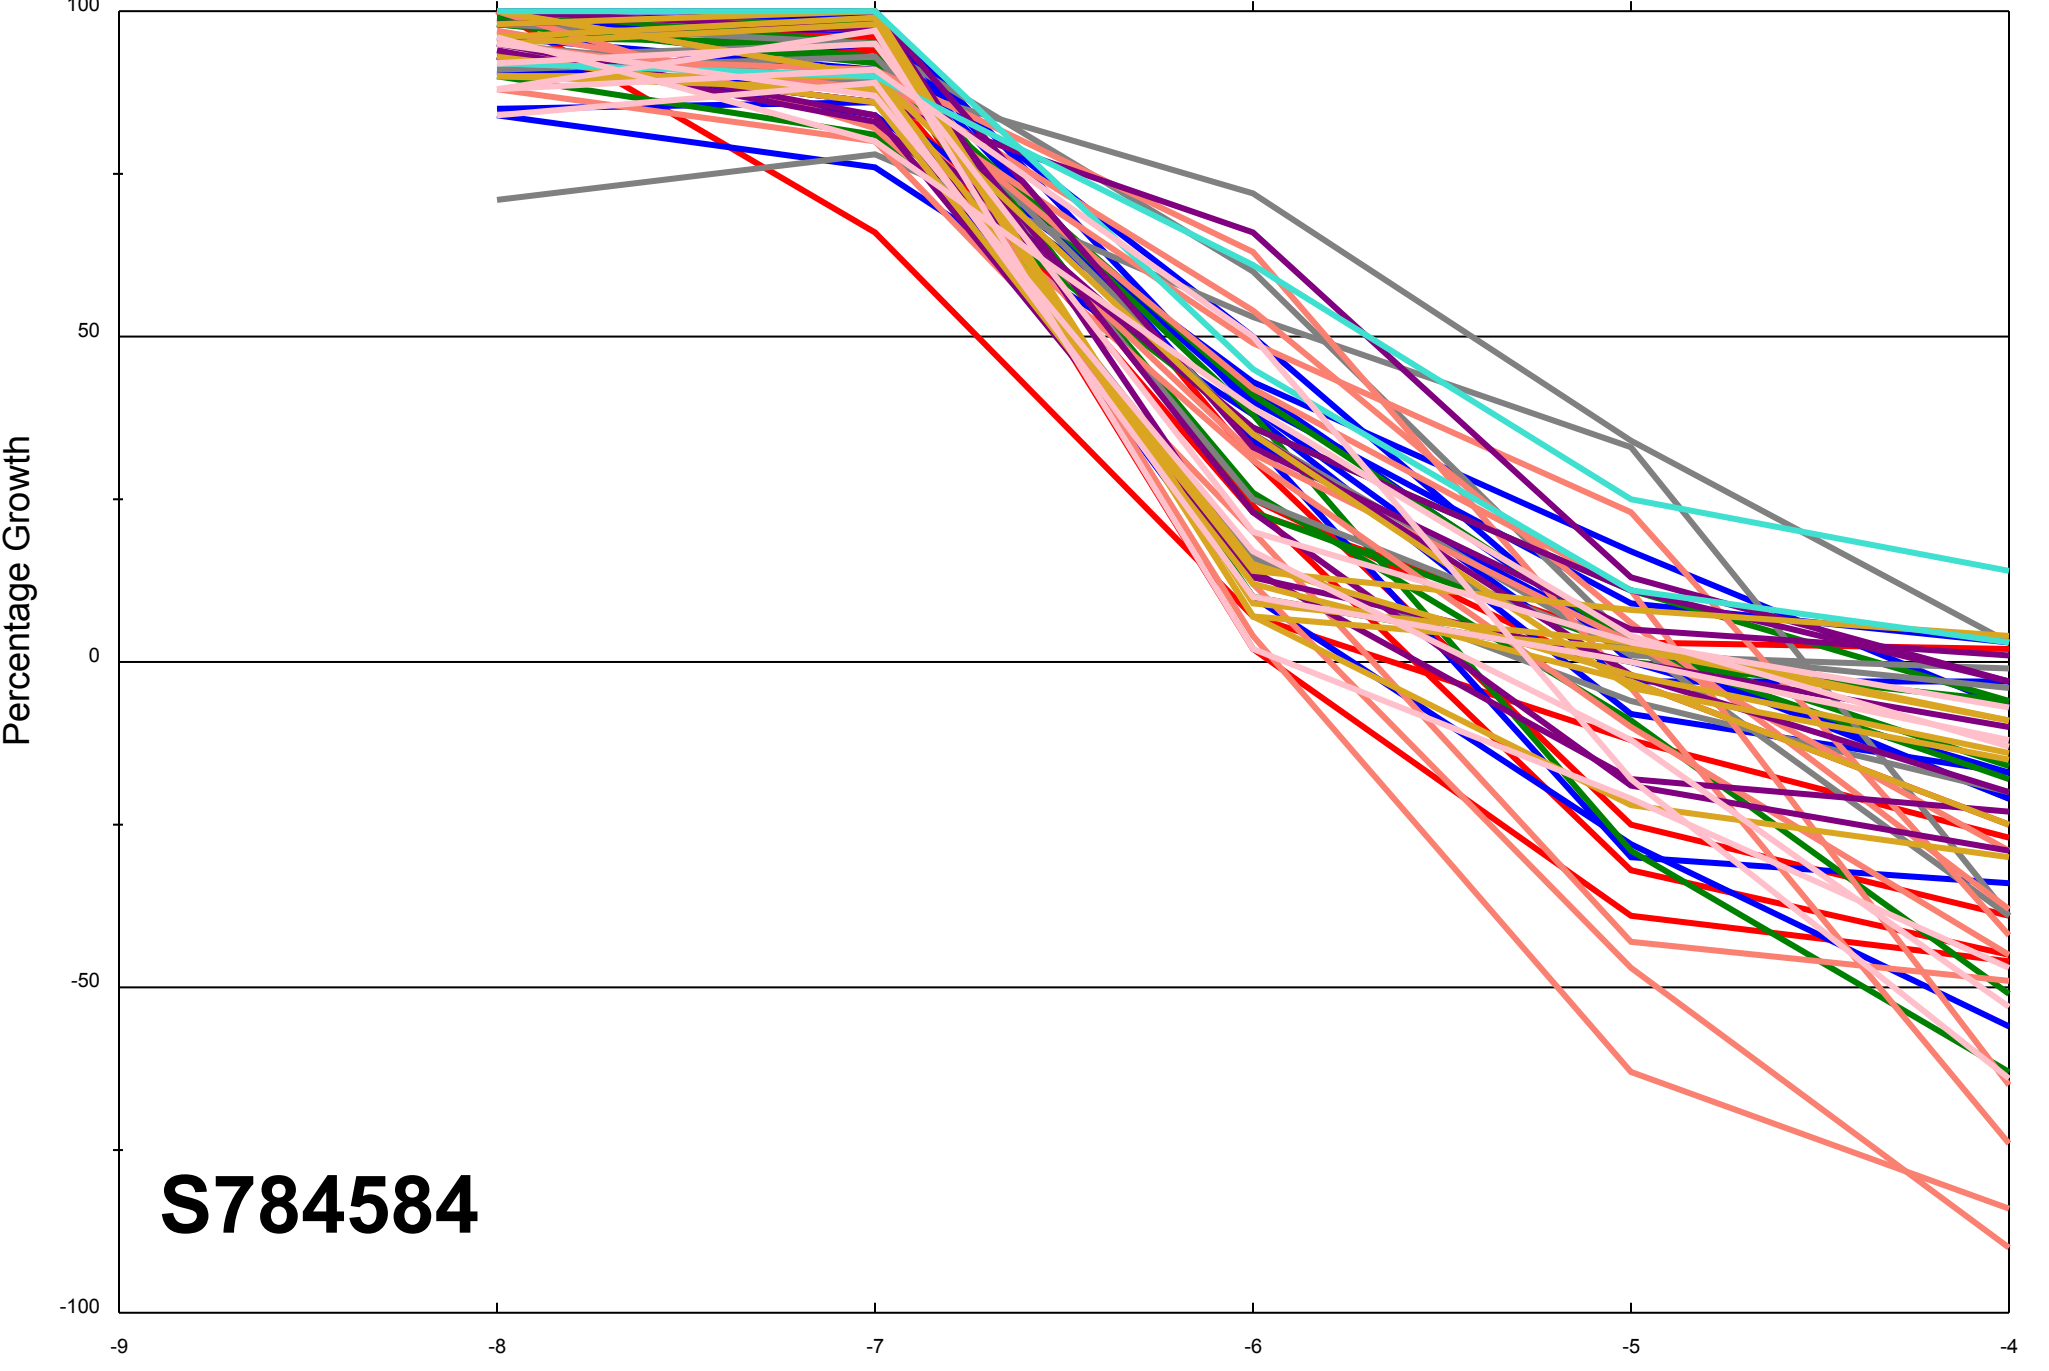

**S784584**

Log<sub>10</sub> of Sample Concentration (Molar)
